# Real-time Dissection and Forecast of Infection Dynamics during a Pandemic

Steven Schulz<sup>a,\*</sup>, Richard Pastor<sup>a</sup>, Cenk Koyuncuoglu<sup>a</sup>, Forrest W. Crawford<sup>b,c,d,e</sup>, Detlef Zernick<sup>a</sup>, André Karch<sup>f</sup>, and Sten Rüdiger<sup>a</sup>

<sup>a</sup>*Machine Learning and Health Unit, Department of Engineering, NET CHECK GmbH, Berlin, Germany*

<sup>b</sup>*Department of Biostatistics, Yale School of Public Health, New Haven, CT, USA*

<sup>c</sup>*Department of Statistics and Data Science, Yale University, New Haven, CT, USA*

<sup>d</sup>*Department of Ecology and Evolutionary Biology, Yale University, New Haven, CT, USA*

<sup>e</sup>*Yale School of Management, New Haven, CT, USA*

<sup>f</sup>*Institute of Epidemiology and Social Medicine, Westfälische Wilhelms-Universität Münster, Münster, Germany*

---

## Abstract

Pandemic preparedness requires institutions, including public health authorities and governments, to detect, survey and control outbreaks. To maintain an accurate, quantitative and up-to-date picture of an epidemic crisis is key. For SARS-CoV-2, this was mostly achieved by ascertaining incidence numbers and the effective reproductive number ( $R_{\text{eff}}$ ), which counts how many people an infected person is likely to infect on average. These numbers give strong hints on past infection dynamics in a population but fail to clearly characterize current and future dynamics as well as potential effects of pharmaceutical and non-pharmaceutical interventions. We show that, by using and combining infection surveillance and population-scale contact statistics, we can obtain a better understanding of the drivers of epidemic waves and the effectiveness of interventions. This approach can provide a real-time picture, thus saving not only many lives by quickly allowing adaptation of the health policies but also alleviating economic and other burdens if an intervention proves ineffective. We factorize  $R_{\text{eff}}$  into contacts and relative transmissibility: Both signals can be used, individually and combined, to identify driving forces of an epidemic, monitoring and assessing interventions, as well as projecting an epidemic's future trajectory. Using data for SARS-CoV-2 and Influenza from 2019 onward in Germany, we provide evidence for the usefulness of our approach. In particular, we find that the effects from physical distancing and lockdowns as well as vaccination campaigns are dominant.

*Keywords:* epidemiology, contact networks, transmissibility, real-time measurement & forecast

---

## 1. Introduction

1 Infectious diseases represent serious threats to  
2 an ever increasingly connected humankind, on par  
3 with e.g. natural disasters and infrastructure fail-  
4 ures. Epidemic preparedness – the ability to pre-  
5 dict and mitigate future epidemic outbreaks – has  
6 thus risen to one of the most pressing challenges in

8 modern societies and recently focused a wealth of  
9 research efforts building on a variety of data [1] in  
10 response to awareness elicited by the SARS-CoV-2  
11 pandemic [2].

12 Epidemic dynamics are shaped at the crossroads  
13 of human and viral driving forces: a pathogen's re-  
14 productive cycle, defining its relative transmission  
15 rate upon physical proximity between individuals  
16 with full or partial susceptibility, as well as hu-

---

\*Corresponding author: [steven.schulz@netcheck.de](mailto:steven.schulz@netcheck.de).

17 man behaviour, via the frequency of transmission-  
18 prone contacts between individuals itself [3]. Criti-  
19 cal events such as the emergence of fitter mutants or  
20 collective shifts in human activity patterns set the  
21 pace for new epidemic waves. Real-time monitoring  
22 of these forces during an epidemic, whether it is fu-  
23 eled mostly by increased contact levels or changes  
24 in relative transmissibility, is of paramount value  
25 for epidemic forecasting as well as the ability to set  
26 up informed, targeted mitigation strategies and es-  
27 timating the effects of (non-)pharmaceutical health  
28 policies [4].

29 Using SARS-CoV-2 and Influenza as key exam-  
30 ples of airborne transmissible contagions, we show-  
31 case monitoring and forecast tools for epidemic  
32 crises centered around a crowd-sourced, real-time  
33 method to assess levels of physical proximity in  
34 a population using GPS location information, the  
35 Contact Index  $CX$  [5]. We show that diverg-  
36 ing trends between contact levels and independ-  
37 ently recorded infection surveillance are indica-  
38 tors of altered relative viral transmissibility. Using  
39 2020-specific data as a baseline for purely contact-  
40 driven SARS-CoV-2 epidemics, all observed transi-  
41 tion points are explained by the onset of key im-  
42 mune escape variants (alpha, delta, omicron). The  
43 resulting dual evolution, Contact Index  $CX$  and re-  
44 lative transmissibility  $T$ , provides a highly transpar-  
45 ent and timely picture of ongoing epidemics, includ-  
46 ing the possibility to identify likely driving forces in  
47 future epidemic waves.

## 48 2. Materials and Methods

### 49 2.1. Contact metrics relevant for epidemics

50 Contact networks are a representation of hu-  
51 man interactions [6] with immediate implications  
52 for the spread of contagions in a population [7, 8]:  
53 Nodes represent individuals and edges are drawn  
54 between pairs of nodes in the event of contact be-  
55 tween them (Figure 1(a,b)). A contagion can prop-

agate through a population along paths following  
56 the links of the network.

57 Intuitively, transmission levels scale with the  
58 average number of links per node  $\langle k \rangle =$   
59  $\sum_{k \geq 0} kP(k) = 2L/N$  [3], where  $P(k)$  is the dis-  
60 tribution of these numbers across a network and  
61  $N$  ( $L$ ) is the number of nodes (links). Beyond  
62 this local property, more global topological network  
63 features – how contacts are collectively configured  
64 across the network – do also affect the course of epi-  
65 demics [3] by fueling and constraining the number  
66 of available paths. Groundbreaking epidemiological  
67 and network-theoretical work established that the  
68 effective reproduction number  $R_{\text{eff}}$ , quantifying epi-  
69 demic spreading, scales with  $\frac{\langle k^2 \rangle}{\langle k \rangle}$  [3, 9, 10, 11, 12],  
70 i.e. the presence of very social nodes (superspread-  
71 ers) with outstanding  $k$  mediate enhanced propa-  
72 gation. Typical social networks are very inhomoge-  
73 neous in terms of social activity, with outstanding  
74 community structure and few individuals responsi-  
75 ble for most contacts [9]. The pivotal role of the  
76 second moment  $\langle k^2 \rangle = \sum_{k \geq 0} k^2 P(k)$  is intuited by  
77 the *friendship paradox* [13]: An individual’s friends  
78 are on average more social than oneself; in other  
79 words, the number of next-nearest neighbors  $\langle k^2 \rangle$  in  
80 the network exceeds the expectation  $\langle k \rangle^2$  from the  
81 number of nearest neighbors, a mere consequence  
82 of non-zero variance in  $P(k)$ :  $\langle k^2 \rangle - \langle k \rangle^2 > 0$  (Supp  
83 Mat S2).

### 85 2.2. Assessing contact levels in real-world networks

86 The contact network relevant to transmission of  
87 airborne viruses such as Influenza and SARS-CoV-  
88 2 arises from physical proximity between individ-  
89 uals (Figure 1(a)). Compared to (virtual) social  
90 networks, such real-world networks are expected to  
91 have distinct properties, as they are constrained  
92 by geography and physical distance, but are also  
93 tremendously more difficult to track at the popula-  
94 tion scale. Coarse contact and mixing patterns in  
95 real-world networks have been inferred using lim-  
96 ited data gathered from surveys [14, 15] or viral

97 phylogeny [16]. Locally confined real-world net- 137  
98 works, such as on cruise ships [17], school cam- 138  
99 campuses [18] or within towns [19] have been measured  
100 using Bluetooth communication between nearby  
101 mobile devices.

102 We use a previously developed approach to probe  
103 population-scale real-world contact networks based  
104 on crowd-sourced datasets of GPS locations [20, 5]  
105 to measure the Contact Index  $CX = \frac{\langle k^2 \rangle}{\langle k \rangle}$  as a  
106 statistical measure of contact levels relevant for  
107 epidemics [5]. The crowd-sourcing data is col-  
108 lected in near real-time via opt-in from each of an  
109 anonymized panel of 1 million mobile app users  
110 (roughly 1% of Germany’s population) and con-  
111 sists of  $\approx 100$  daily samples per device tagged with  
112 time and GPS location information. It allows us  
113 to reconstruct samples of the actual contact net-  
114 work realized in the population: Contacts (links)  
115 are drawn between devices (nodes) co-located in  
116 space and time (Figure 1(a) and Supp Mat S1). Ex-  
117 amples of reconstructed contact networks are shown  
118 in Fig. 1(e).

### 119 2.3. Network sampling correction

120 The incomplete nature of such crowd-sourced  
121 data represents a major challenge: Contacts from  
122 uninvolved or inactive devices are not captured, giv-  
123 ing rise to missing nodes and links in the network.  
124 This aspect of our data can be crafted into a net-  
125 work sampling framework [21, 22] in which nodes  
126 and edges are randomly removed with probabili-  
127 ties  $p$  and  $q$ , respectively (Figure 1(b,c) and Supp  
128 Mat S3).  $p$  denotes the population share repre-  
129 sented in the panel of app users, while  $q$  is inter-  
130 preted as the rate  $f_{ij}$  of simultaneous samples from  
131 pairs of app users (Figure 1(c)), a necessary con-  
132 dition to detect a contact between users with indi-  
133 vidual sample rates  $f_i$  and  $f_j$ , respectively. These  
134 sampling parameters are subject to change over  
135 time beyond daytime-related periodicity (see be-  
136 low), mostly in response to software updates and

app usage (Figure 1(d)), and are heterogeneous in  
138 space (Supp Mat S4 and Figure S3(a,b,c)).

139 For simplicity, we here use daily averages of sam-  
140 ple rates. The rate  $f_{ij}$  of simultaneous samples  
141 tends to exceed the expectation from individual fre-  
142 quencies  $f_i f_j$  under the hypothesis of independence  
143 of distinct mobile devices, i.e.  $f_{ij} > f_i f_j$ , espe-  
144 cially prior to February 2020 (Figure 1(d)); a ma-  
145 jor app update in February 2020 has significantly  
146 altered the daytime distribution and overall num-  
147 ber of samples (Figure 1(d)). This apparent correla-  
148 tion between devices stems from the non-uniformity  
149 of the sampling activity over the day: Devices are  
150 more active during daytime than at night, an effect  
151 particularly prominent prior to February 2020 (Fig-  
152 ure 1(d)). However, aside from a common daytime  
153 pattern, devices show a predominantly independent  
154 activity pattern from one another (Figure 1(d)):  
155 At any given timepoint (2 min interval), squared  
156 single-device distributions, i.e.  $\frac{\rho_1(t)^2}{\int \rho_1(t)^2 dt}$ , do cap-  
157 ture the distribution of simultaneous samples  $\rho_2(t)$   
158 across the day well. Solely in consequence to the  
159 daytime-related correlation, we are likely to slightly  
160 underestimate the true value of  $q$  by using daily av-  
161 erages.

162 Our improved mathematical modeling based  
163 on Horvitz-Thompson theory disentangles actual  
164 changes in contact levels from signals unrelated to  
165 the users’ contact behaviour, including participa-  
166 tion and activity levels in the user panel, but ex-  
167 cluding correlation between devices, see above. We  
168 thus achieve a persistent and comparable results  
169 across the full time span since the beginning of mea-  
170 surement in 2019 (Supp Mat S3 and Supp Mat S4).  
171 In summary, we show that the Contact Index  $CX$   
172 of an unobserved complete network  $G$  can be re-  
173 trieved from a network sample  $G^*$  obtained under  
174 the described sampling scheme according to

$$CX - 1 = \frac{CX^* - 1}{pq_{\text{eff}}}, \quad (1)$$

175 where  $CX^* = \frac{\langle k^{*2} \rangle^*}{\langle k^* \rangle^*}$  is the same quantity measured 214  
176 within the network sample and  $q_{\text{eff}}$  is an effective 215  
177 node sampling probability for networks of unique 216  
178 contacts (see below). 217

179 Importantly, abstractions of contact networks ex- 218  
180 ist in two distinct flavours: weighted versus un- 219  
181 weighted [23]. Links may be endowed with weights 220  
182  $w_{ij} \in \{0, 1, 2, \dots\}$  representing the duration or 221  
183 multiplicity of contact between individuals  $i$  and 222  
184  $j$  [24] or simply indicate the presence or absence of 223  
185 contact  $a_{ij} = \text{sgn}(w_{ij}) \in \{0, 1\}$  (Figure 1(f)). In 224  
186 the epidemiological context, we assume that net- 225  
187 work topology, represented by  $a_{ij}$ , is more im- 226  
188 portant than the recurrence of contacts between 227  
189 the same individuals: For instance, the (statistical) 228  
190 contribution to viral spread from a cluster of 229  
191 short contacts at a crowded event would outpace a 230  
192 lengthy contact between an isolated couple while in 231  
193 lockdown. We thus focus on unweighted networks 232  
194 and exclude contact duration in our analyses other 233  
195 than in the fact that short contacts are unlikely to 234  
196 be recorded during the random sampling inherent 235  
197 to the crowd-sourcing method. 236

198 However, network sampling destroys topological 237  
199 information about underlying complete networks 238  
200 (Figure 1(f)); the success of Horvitz-Thompson the- 239  
201 ory [21] to establish a connection between original 240  
202 and sample networks relies in the use of weighted 241  
203 links (Supp Mat S3). To establish the same con- 242  
204 nection for unweighted networks, we devised a 243  
205 Bayesian approach which identifies missing topo- 244  
206 logical information as the weight distribution for 245  
207 existing links in the complete network  $P(w|w > 0)$  246  
208 and defines the edge sampling probability as 247

$$q_{\text{eff}} = P(w^* > 0|w > 0) = 1 - G_{w|w>0}(1 - q), \quad (2)$$

209 where  $G_{w|w>0}(\xi) = \sum_{w>0} P(w|w > 0)\xi^w$  is the 249  
210 probability generating function of  $P(w|w > 0)$  250  
211 (Supp Mat S3). We find that available com- 251  
212 plete real-world networks in various contexts [17, 252  
213 18, 19] appear to show strikingly similar weight 253

distributions (Figure 1(g)), which suggests a uni-  
versal shape of  $P(w|w > 0)$  also applicable to  
our problem. Here, “complete” refers to the  
aspect that these networks represent a fraction  
of the population ( $p < 1$ ), but all contacts  
within that sub-population are being detected  
( $q = 1$ ) – node sampling, but no edge sampling.  
These distributions are consistent with power laws  
 $P(w|w > 0) = w^{-(1+\alpha)}/\zeta(1 + \alpha)$  with small expo-  
nents [25, 26] (Figure 1(g)), a repeatedly demon-  
strated feature of complex networks [27] and be-  
yond [28]. Yet, we do not imply that power laws  
are the true mechanism behind network weights, as  
a variety of other distribution classes are easily con-  
founded with power laws [28, 29, 30], but merely use  
it as a prior for  $P(w|w > 0)$ .

### 3. Results

#### 3.1. Evolution of $CX$ since 2019

By means of our refined correction method for  
network sampling effects, we achieve a consistent  
measurement of contact levels since the begin-  
ning of crowd-sourcing in 2019, despite the time-  
dependent sampling. That is, we cover the prelude  
and entire course of the SARS-CoV-2 epidemic in  
Germany (Figure 2(a)). The gap in February 2020  
is explained by missing data due to the rollout of a  
major crowd-sourcing software update.

Holiday season comes along with reduced  $CX$  un-  
der normal conditions, as shown by the Fall and  
Christmas breaks in 2019, thus showing a reduc-  
tion of transmission-prone contacts. The onset of  
the first SARS-CoV-2 wave in March 2020 induced  
an unequivocally more pronounced drop in  $CX$ ,  
probably explained by a more systematic cessation  
of super-spreading activities. The dramatically al-  
tered contact network structure during a lockdown  
is depicted in Figure 1(e).

Since onset of the SARS-CoV-2 pandemic,  
changes in contact behaviour as reflected by  $CX$   
underwent several periods of spiking (partial or

254 complete deregulation of mass events in fall 2020, 295  
255 fall 2021 and spring 2022) and damping (winter 296  
256 wave 2020, emergence of the omicron variant in 297  
257 late 2021). Overall, a similar evolution is observed 298  
258 between  $CX$  and the rigor of SARS-CoV-2-related 299  
259 policy as measured by the Government-Response 300  
260 Index [31] (Figure S1(a)), thus indicating broad 301  
261 awareness of the situation at the population and 302  
262 governance levels albeit no causal link shall be im- 303  
263 plied. 304

264 Interestingly, recent  $CX$  values have not yet re- 305  
265 turned to pre-pandemic levels by a factor of 2 to 3, 306  
266 despite a return to no contact-related restrictions 307  
267 in 2022. This suggests the existence of a hystere- 308  
268 sis effect in addition to the fast response of  $CX$  309  
269 discussed above: The collective behaviour has not 310  
270 returned to its unperturbed state in response to re- 311  
271 laxed conditions, possibly as a result of continued 312  
272 broad perception of disease risk [32, 33]. 313

273 From a dimensional viewpoint,  $CX$  represents 314  
274 an average number of (next-nearest) contacts per 315  
275 (nearest) contact: Comparing values of  $CX$  across 316  
276 areas with vastly different population densities 317  
277 within Germany supports our expectation that  $CX$  318  
278 scales (non-linearly) with the absolute propensity 319  
279 of physical proximity between individuals (Fig-  
280 ure S3(d) and Supp Mat S4).

### 281 3.2. Deciphering epidemic forces: contacts vs. rel- 320 282 ative transmissibility 321

283 In 2020, SARS-CoV-2 epidemic trends were pri- 322  
284 marily driven by trends in contact levels, as both 323  
285 immune escape variants and vaccines were not yet 324  
286 relevant and relative SARS-CoV-2 transmissibility 325  
287 – its intrinsic transmission probability per contact 326  
288 – was thus constant (Figure 2(b)): Official daily 327  
289 now-cast reproduction numbers  $R_{\text{eff}}$ , independently 328  
290 recorded from national infection surveillance [34], 329  
291 correlate well with daily  $CX$ , but  $CX$  shows a 330  
292 time lead of approximately 2 – 3 weeks over  $R_{\text{eff}}$  331  
293 (Figure S1(a, right inset)) [5], explained by incu- 332  
294 bation time as well as testing and reporting de- 333

lays. This underlines the predictive character of  
real-time contact metrics for wild-type dominated  
epidemics [20]. Since then, the correlation between  
 $R_{\text{eff}}$  and  $CX$  has repeatedly changed, with the re-  
sulting signal quantifying shifts in relative transmis-  
sibility accountable to key epidemic changes other  
than contacts.

The effective reproduction number  $R_{\text{eff}}$  is defined  
by  $R_{\text{eff}} = \langle k \rangle \cdot U \cdot \tau$ , where  $\langle k \rangle$  denotes the contact  
number per day,  $U$  the probability of transmission  
per contact, and  $\tau$  the mean duration of infectivity  
in days. Both  $U$  and  $\tau$  are determined by physio-  
logical processes involved in transmission and, to-  
gether, define the intrinsic transmission efficiency  
(per contact)  $T = U \cdot \tau$ .

Furthermore, as we assume  $CX = \frac{\langle k^2 \rangle}{\langle k \rangle}$   
replaces  $\langle k \rangle$ , we replace the definition by  
 $R_{\text{eff}} = (a + b \cdot CX) \cdot T$ . A linear relationship of  
this form between  $CX$  and  $R_{\text{eff}}$  is motivated by our  
findings in 2020. We use values for  $a$  and  $b$  obtained  
from a linear regression between  $CX$  and wild-type  
 $R_{\text{eff}}$  data at the optimal time delay of  $\Delta t = 16$  days  
(Figure S1(a, left inset) and Supp Mat S5). Upon  
interpreting  $R_{\text{WT}}(CX) \equiv a + b \cdot CX$  as the wild-type  
specific reproduction number, we have that

$$R_{\text{eff}} = R_{\text{WT}}(CX) \cdot T, \quad (3)$$

where  $T$  represents relative transmissibility with re-  
spect to wild-type in a fully susceptible population  
( $T_{\text{WT}} = 1$ ). Note that, in contrast to now-cast data,  
Eq. (3) assigns reproduction numbers to the day of  
contact/infection.

From independently recorded values for  $R_{\text{eff}}$  and  
 $CX$ , we can determine the relative transmissi-  
bility of the contagion by factoring out contact-  
related contributions from overall infection dynam-  
ics as  $T = \frac{R_{\text{eff}}}{R_{\text{WT}}(CX)}$  for any given day. We ex-  
pect network-wide propagation of transmissibility-  
related information to be slow compared to network  
dynamics itself and, thus,  $T$  to undergo evolution  
on longer timescales. We interpret fast signal in



334  $T$  as random fluctuations from the measurement of  
335  $R_{\text{eff}}$  and capture actual trends by  $\langle T \rangle$ , centered av-  
336 erages over sliding time windows of 2 months (Supp  
337 Mat S5).

### 338 3.3. Epidemic evolution of relative SARS-CoV-2 339 transmissibility

340 The evolution of relative SARS-CoV-2 transmis-  
341 sibility  $\langle T \rangle$  is shown in Figure 2(b). This time se-  
342 ries reenacts the various phases of the SARS-CoV-2  
343 pandemic:

344 Relative SARS-CoV-2 transmissibility  $\langle T \rangle$  is ap-  
345 proximately equal to unity throughout 2020, an  
346 initial period purely driven by unperturbed wild-  
347 type epidemics that we used to “calibrate”  $CX$  and  
348  $R_{\text{eff}}$  which evolve on shorter timescales. It sub-  
349 sequently follows a tug-of-war pattern shaped by  
350 alternating epidemic forces beyond contacts: im-  
351 mune escape variants and development of popula-  
352 tion immunity through infection and vaccination.  
353 Three waves of increased relative transmissibility  
354 are explained by the takeover of fitter virus lin-  
355 eages (Figure 2(b)), specifically alpha (spring 2021),  
356 delta (summer 2021) and omicron BA.1/BA.2 (win-  
357 ter 2021/22). We hypothesize that subsequent re-  
358 laxation of  $\langle T \rangle$  after each wave may be attributed to  
359 natural immunity, while the superposed long-term  
360 downward trend may be explained by the additional  
361 immunity acquisition through (initial and booster)  
362 vaccination campaigns. Interestingly, the effect of  
363 omicron BA.4/BA.5 takeover in summer 2022 on  
364  $\langle T \rangle$  is nowhere close to those of previous variants.

365 Comparing correlations with different parame-  
366 ters rules out the possibility that the measured  $\langle T \rangle$   
367 is shaped by factors confounding the reproduction  
368 numbers or  $CX$  values (Figure S1(b,c) and Supp  
369 Mat S5). These possible confounders include viral  
370 prevalence,  $CX$  itself through higher-order effects  
371 from network sampling not captured by our mod-  
372 eling and other topological network features (such  
373 as clustering, small-world properties) as well as  $R_{\text{eff}}$

374 itself through changes in testing strategies and sys-  
375 tematic under-reporting of infections [35]. For in-  
376 stance, testing individuals indiscriminately versus  
377 focusing test capacities on suspected infection cases  
378 may lead to incomparable snapshots of ongoing in-  
379 fection dynamics. Overall, strong positive correla-  
380 tion is exclusively observed between  $\langle T \rangle$  and variant  
381 dynamics (Figure S1(b,c)) [36]. In this analysis, we  
382 use test positivity [37] and results from local preva-  
383 lence studies [38] as proxies for overall prevalence.  
384 Also, we neglect possible effects from network sam-  
385 pling on different topological measures [39, 40], but  
386 we expect trends to be conserved as long as the  
387 sampling process remains unchanged.

388 We note the absence of seasonal oscillations in  
389  $\langle T \rangle$  as well as clear signatures of mask mandates  
390 (in effect across many social contexts between April  
391 2020 and April 2022). A seasonal oscillation in  $\langle T \rangle$ ,  
392 larger values in winter and smaller values in sum-  
393 mer, might be expected from the shift of human ac-  
394 tivity between in- and outdoor settings. Also, pre-  
395 vious research established the effectiveness of mask  
396 usage at reducing transmission of respiratory dis-  
397 eases (reviewed in [41]). Overall, our results sug-  
398 gest that, at least in the epidemic stage of SARS-  
399 CoV-2, infection rates were predominantly driven  
400 by the strong variability in contacts as well as the  
401 repeated emergence of more transmissible variants,  
402 in line with previous findings [42, 43, 44].

### 403 3.4. Forecast of infection level and trend changes

404 The challenge of epidemic forecast consists in the  
405 accurate prediction of current and future reproduc-  
406 tion numbers  $R_{\text{eff}}$ . Using the rationale that trends  
407 in infection levels carry the combined signature of  
408 trends in contact and relative transmissibility lev-  
409 els, we propose to construct predictions according  
410 to

$$R_{\text{true}}(t) = R_{\text{WT}}(CX(t)) \cdot \langle T(t) \rangle, \quad (4)$$

411 where  $R_{\text{true}}$  is assigned to the projected day of con- 452  
412 tact/infection. The key difference to Eq. (3) is the 453  
413 use of  $\langle T \rangle$  which eliminates noise from reproduc- 454  
414 tion numbers. Importantly, we therefore expect 455  
415 that our prediction  $R_{\text{true}}$  represents actual epidemic 456  
416 trends (ground truth) more accurately than epi- 457  
417 demic surveillance ( $R_{\text{eff}}$ ). 458

418 Figure 3(a) shows  $R_{\text{true}}$  together with data from 459  
419 infection surveillance, both plotted with respect to 460  
420 their date of recording (assuming real-time  $CX$  461  
421 measurement). This shows how our prediction 462  
422 overall anticipates current epidemic trends that 463  
423 are observed via infection surveillance only about 464  
424  $\Delta t = 2 - 3$  weeks later. Thus, we propose to use 465  
425 our method as a tool for real-time infection surveil- 466  
426 lance. 467

427 To extend forecasts beyond this horizon and pre- 468  
428 dict future reproduction numbers,  $CX$  and  $\langle T \rangle$  469  
429 themselves need to be projected beyond latest data. 470  
430 For several choices of the current day  $t_0$ , Figure 3(b) 471  
431 showcases forecasts ( $R_{\text{pred}}$ ) where  $CX$  and  $\langle T \rangle$  are 472  
432 continued beyond the last days of available data 473  
433 ( $t_0$  and  $t_0 - \Delta t$ , respectively) using autoregressive 474  
434 integrated moving average (ARIMA) models prior 475  
435 to applying Eq. (4) (Supp Mat S6). These fore- 476  
436 casts outperform a null forecast based on a mere 477  
437 ARIMA-type continuation of infection surveillance 478  
438 data ( $R_{\text{eff}}$ ), as shown by narrower distributions of 479  
439 residuals ( $R_{\text{pred}} - R_{\text{true}}$ ) across all choices of  $t_0$  (Fig- 480  
440 ure 3(b)). Furthermore, we highlight the broad ap- 481  
441 plicability of our method to airborne infectious dis- 482  
442 eases by performing an identical forecast analysis 483  
443 for Influenza (Figure S2(a)), using coarser infection 484  
444 surveillance data [45] and presuming a similar rela- 485  
445 tionship between  $R_{\text{eff}}$  and  $CX$  as for SARS-CoV-2 486  
446 (Supp Mat S6). 487

447 Most importantly, trend changes in epidemic 488  
448 driving forces such as  $\langle T \rangle$  and  $CX$  are indicators of 489  
449 new phases in an epidemic. Timely detection of new 490  
450 trends in these time series, e.g. using anomaly de- 491  
451 tection methods, can provide valuable information

to estimate the risk of upcoming epidemic waves  
and to predict their nature – whether dynamics is  
fueled by contacts or increased transmission effi-  
ciency. Such trend detection is potentially easier  
to achieve but equally informative than the abil-  
ity to accurately predict infection surveillance. The  
onset of rising trends could shape decision-making  
with regard to the effectiveness of health policies,  
e.g. pharmaceutical and non-pharmaceutical in-  
terventions for rising  $\langle T \rangle$  and  $CX$ , respectively.  
Figures 3(c) and S2(b) highlight rising and falling  
trends in both  $CX$  and  $T$  for SARS-CoV-2 and In-  
fluenza, respectively, akin to trends in stock prices.  
For SARS-CoV-2, trend changes are timely indica-  
tors of all major escape variant- and contact-driven  
epidemic turning points (Figure 3(c)). Unlike for  
SARS-CoV-2 in its epidemic stage, major upheavals  
in relative transmissibility for Influenza are limited  
to seasonality, with the notable exception of 2020,  
presumably reflecting its endemic dynamics (Fig-  
ure S2(b)).

## 473 Discussion

474 We presented a simple, yet insightful quantitative  
475 method for a data-driven decomposition of overall  
476 epidemic dynamics into contact-related and trans-  
477 mission efficiency-related contributions. It relies  
478 on both the availability of infection surveillance  
479 data as well as crowd-sourced GPS location data  
480 to detect and quantify physical proximity between  
481 susceptible individuals. Its appeal resides in the  
482 merely bivariate yet highly informative projection  
483 of epidemics paving the way towards timely iden-  
484 tification of driving forces in an ongoing epidemic  
485 – human versus viral factors – and possibly effec-  
486 tive mitigation strategies – pharmaceutical versus  
non-pharmaceutical.

487 The approach can be used for epidemic forecast  
488 in multiple ways. Recent and projected future val-  
489 ues of  $CX$  and  $\langle T \rangle$  can be used for short-term  
490 ( $2 - 3$  weeks) and long-term prediction of infection  
491

492 or reproduction numbers, thus taking our previ- 533  
493 ously described short-term forecast further [5]. Yet, 534  
494 a timely detection of trend changes could reliably 535  
495 forecast upcoming waves and their nature without 536  
496 the necessity to accurately predict infection surveil- 537  
497 lance data. These tools can lead towards a more 538  
498 strategic approach to epidemic mitigation and po- 539  
499 tentially save lives by reducing the spread of deadly 540  
500 diseases.

501 Results from the presumably most systematically 542  
502 tracked epidemic to date, SARS-CoV-2, draw the 543  
503 picture of co-evolution within the virus-host rela- 544  
504 tion: Increasing immunity levels in the host pop- 545  
505 ulation alternate with step-wise adaptation of the 546  
506 virus through immune-escape variants. Other fre- 547  
507 quently discussed factors, including mask policies 548  
508 and seasonality, are presumably still below the cur- 549  
509 rent statistical resolution of our method, defined by 550  
510 the sampling noise in the  $CX$  and  $R_{\text{eff}}$  time series.  
511 Moreover, a larger impact of seasonal variation is  
512 expected in the endemic phase of SARS-CoV-2 [46].

513 Our method is broadly applicable to airborne 554  
514 contagions beyond SARS-CoV-2, but depends on 555  
515 the availability of infection surveillance and crowd- 556  
516 sourcing strategies that remain persistent over ex- 557  
517 tended amounts of time. Changes in testing strat- 558  
518 egy can lead to signal and biases unrelated to un- 559  
519 derlying epidemic driving forces [35]. More cru- 560  
520 cially, systematic infection surveillance is not im- 561  
521 plemented beyond the case of SARS-CoV-2. We 562  
522 illustrated a framework to correct for the effect 563  
523 of varying sampling depth in the contact network. 564  
524 Yet, higher-order effects in the signal can occur as 565  
525 a result of sampling aspects not captured by our 566  
526 mathematical modeling. In order to ensure valid 567  
527 prognoses through our method, we advocate for sys- 568  
528 tematic and persistent crowd-sourcing and infection 569  
529 surveillance strategies across a variety of diseases 570  
530 with epidemic potential.

531 Geographical resolution of our forecast method 571  
532 is currently limited by the sampling depth, as the 572  
573

estimation especially of higher moments of degree 533  
distributions  $P(k)$  becomes increasingly difficult as 534  
smaller portions of the network are available. A 535  
higher spatial resolution of contact and relative 536  
transmissibility levels, with potential to locate the 537  
origin of new variants of concern and define locally 538  
targeted mitigation strategies, can be achieved by 539  
e.g. increasing the panel of app users. 540

541 Our analysis assumes statics, but actual contact 542  
networks are dynamic in nature [47, 48]: While 543  
some contacts are frequently repeated (e.g. be- 544  
tween household members), other contacts are ran- 545  
domly redrawn on each occasion (e.g. in pub- 546  
lic transportation), with implications for epidemic 547  
spread [49, 50]. Our method can be improved by 548  
analyzing contact data in light of existing models 549  
of dynamic networks [51, 48].

## 550 Acknowledgment

551 This work was supported by grants from the 552  
Federal Government of Germany through the 553  
Federal Ministry for Economic Affairs and Cli- 554  
mate Action (BMWK) for the project DAKI-FWS 555  
(01MK21009A) and the Federal Ministry of Educa- 556  
tion and Research (BMBF) for the project Optim- 557  
Agent (031L0299).

## 558 References

- 559 [1] A. Rodríguez, H. Kamarthi, P. Agarwal, J. Ho, M. Pa- 560  
tel, S. Sapre, B. A. Prakash, Data-centric epidemic 561  
forecasting: A survey, arXiv preprint arXiv:2207.09370 562  
(2022).
- 563 [2] A. Maxmen, Has covid taught us anything about pan- 564  
demic preparedness?, *Nature* 596 (2021) 332–335.
- 565 [3] R. Pastor-Satorras, C. Castellano, P. Van Mieghem, 566  
A. Vespignani, Epidemic processes in complex 567  
networks, *Rev. Mod. Phys.* 87 (2015) 925–979. 568  
doi:10.1103/RevModPhys.87.925. 569  
URL [https://link.aps.org/doi/10.1103/ 570  
RevModPhys.87.925](https://link.aps.org/doi/10.1103/RevModPhys.87.925)
- 571 [4] T. Alamo, D. G. Reina, P. Millán Gata, V. M. Preciado, 572  
G. Giordano, Data-driven methods for present and fu- 573  
ture pandemics: Monitoring, modelling and managing,



- 574 Annual Reviews in Control 52 (2021) 448–464. doi: 626  
575 <https://doi.org/10.1016/j.arcontrol.2021.05.003>. 627  
576 URL [https://www.sciencedirect.com/science/ 628](https://www.sciencedirect.com/science/article/pii/S1367578821000419)  
577 [article/pii/S1367578821000419](https://www.sciencedirect.com/science/article/pii/S1367578821000419) 629
- 578 [5] S. Rüdiger, S. Konigorski, A. Rakowski, J. A. Edelman, 630  
579 D. Zernick, A. Thieme, C. Lippert, Predicting the sars- 631  
580 cov-2 effective reproduction number using bulk contact 632  
581 data from mobile phones, *Proceedings of the National 633*  
582 *Academy of Sciences* 118 (31) (2021) e2026731118. 634  
583 arXiv: [https://www.pnas.org/doi/pdf/10.1073/ 635](https://www.pnas.org/doi/pdf/10.1073/pnas.2026731118)  
584 [pnas.2026731118](https://www.pnas.org/doi/pdf/10.1073/pnas.2026731118), doi:10.1073/pnas.2026731118. 636  
585 URL [https://www.pnas.org/doi/abs/10.1073/pnas. 637](https://www.pnas.org/doi/abs/10.1073/pnas.2026731118)  
586 [2026731118](https://www.pnas.org/doi/abs/10.1073/pnas.2026731118) 638
- 587 [6] M. E. J. Newman, J. Park, Why social networks are 639  
588 different from other types of networks, *Phys. Rev. E* 68 640  
589 (2003) 036122. doi:10.1103/PhysRevE.68.036122. 641  
590 URL [https://link.aps.org/doi/10.1103/PhysRevE. 642](https://link.aps.org/doi/10.1103/PhysRevE.68.036122)  
591 [68.036122](https://link.aps.org/doi/10.1103/PhysRevE.68.036122) 643
- 592 [7] M. Keeling, The implications of network structure 644  
593 for epidemic dynamics, *Theoretical population biology* 645  
594 67 (1) (2005) 1–8. 646
- 595 [8] C. Moore, M. E. J. Newman, Epidemics and percolation 647  
596 in small-world networks, *Phys. Rev. E* 61 (2000) 5678– 648  
597 5682. doi:10.1103/PhysRevE.61.5678. 649  
598 URL [https://link.aps.org/doi/10.1103/PhysRevE. 650](https://link.aps.org/doi/10.1103/PhysRevE.61.5678)  
599 [61.5678](https://link.aps.org/doi/10.1103/PhysRevE.61.5678) 651
- 600 [9] M. Barthélemy, A. Barrat, R. Pastor-Satorras, 652  
601 A. Vespignani, Dynamical patterns of epidemic out- 653  
602 breaks in complex heterogeneous networks, *Journal of 654*  
603 *Theoretical Biology* 235 (2) (2005) 275–288. 655  
604 doi:<https://doi.org/10.1016/j.jtbi.2005.01.011>. 656  
605 URL [https://www.sciencedirect.com/science/ 657](https://www.sciencedirect.com/science/article/pii/S0022519305000251)  
606 [article/pii/S0022519305000251](https://www.sciencedirect.com/science/article/pii/S0022519305000251) 658
- 607 [10] Y. Moreno, R. Pastor-Satorras, A. Vespignani, Epi- 659  
608 demic outbreaks in complex heterogeneous networks, 660  
609 *The European Physical Journal B-Condensed Matter 661*  
610 *and Complex Systems* 26 (4) (2002) 521–529. 662
- 611 [11] R. M. May, R. M. Anderson, M. E. Irwin, R. M. 663  
612 Anderson, J. M. Thresh, The transmission dynamics 664  
613 of human immunodeficiency virus (hiv), *Philosophical 665*  
614 *Transactions of the Royal Society of London. B, Bi- 666*  
615 *ological Sciences* 321 (1207) (1988) 565–607. arXiv: 667  
616 [https://royalsocietypublishing.org/doi/pdf/10. 668](https://royalsocietypublishing.org/doi/pdf/10.1098/rstb.1988.0108)  
617 [1098/rstb.1988.0108](https://royalsocietypublishing.org/doi/pdf/10.1098/rstb.1988.0108), doi:10.1098/rstb.1988.0108. 669  
618 URL [https://royalsocietypublishing.org/doi/abs/ 670](https://royalsocietypublishing.org/doi/abs/10.1098/rstb.1988.0108)  
619 [10.1098/rstb.1988.0108](https://royalsocietypublishing.org/doi/abs/10.1098/rstb.1988.0108) 671
- 620 [12] R. M. May, R. M. Anderson, Transmission dynamics of 672  
621 hiv infection, *Nature* 326 (1987) 137–142. 673
- 622 [13] S. L. Feld, Why your friends have more friends than 674  
623 you do, *American Journal of Sociology* 96 (6) (1991) 675  
624 1464–1477. arXiv:<https://doi.org/10.1086/229693>, 676  
625 doi:10.1086/229693. 677
- URL <https://doi.org/10.1086/229693>
- [14] J. M. Read, K. T. Eames, W. J. Edmunds, Dynamic 678  
social networks and the implications for the spread of 679  
infectious disease, *Journal of The Royal Society Inter- 680*  
*face* 5 (26) (2008) 1001–1007. 681
- [15] J. Mossong, N. Hens, M. Jit, P. Beutels, K. Au- 682  
ranen, R. Mikolajczyk, M. Massari, S. Salmaso, 683  
G. S. Tomba, J. Wallinga, J. Heijne, M. Sadkowska- 684  
Todys, M. Rosinska, W. J. Edmunds, Social con- 685  
tacts and mixing patterns relevant to the spread of 686  
infectious diseases, *PLOS Medicine* 5 (3) (2008) 1–1. 687  
doi:10.1371/journal.pmed.0050074. 688  
URL [https://doi.org/10.1371/journal.pmed. 689](https://doi.org/10.1371/journal.pmed.0050074)  
[0050074](https://doi.org/10.1371/journal.pmed.0050074) 690
- [16] G. E. Leventhal, R. Kouyos, T. Stadler, V. von 691  
Wyl, S. Yerly, J. Böni, C. Celleraï, T. Klimkait, 692  
H. F. Günthard, S. Bonhoeffer, Inferring epi- 693  
demic contact structure from phylogenetic trees, 694  
*PLOS Computational Biology* 8 (3) (2012) 1–10. 695  
doi:10.1371/journal.pcbi.1002413. 696  
URL [https://doi.org/10.1371/journal.pcbi. 697](https://doi.org/10.1371/journal.pcbi.1002413)  
[1002413](https://doi.org/10.1371/journal.pcbi.1002413) 698
- [17] R. Pung, J. A. Firth, L. G. Spurgin, V. J. Lee, A. J. 699  
Kucharski, Using high-resolution contact networks to 700  
evaluate sars-cov-2 transmission and control in large- 701  
scale multi-day events, *Nature communications* 13 (1) 702  
(2022) 1–11. 703
- [18] P. Sapiezynski, A. Stopczynski, D. D. Lassen, 704  
S. Lehmann, Interaction data from the copenhagen net- 705  
works study, *Scientific Data* 6 (1) (2019) 315. 706
- [19] S. M. Kissler, P. Klepac, M. Tang, A. J. Conlan, J. R. 707  
Gog, Sparking “the bbc four pandemic”: Leveraging 708  
citizen science and mobile phones to model the spread 709  
of disease, *bioRxiv* (2020). arXiv:[https://www.biorxiv. 710](https://www.biorxiv.org/content/early/2020/05/12/479154.full.pdf)  
[org/content/early/2020/05/12/479154.full.pdf](https://www.biorxiv.org/content/early/2020/05/12/479154.full.pdf), 711  
doi:10.1101/479154. 712  
URL [https://www.biorxiv.org/content/early/2020/ 713](https://www.biorxiv.org/content/early/2020/05/12/479154)  
[05/12/479154](https://www.biorxiv.org/content/early/2020/05/12/479154) 714
- [20] F. W. Crawford, S. A. Jones, M. Cartter, S. G. 715  
Dean, J. L. Warren, Z. R. Li, J. Barbieri, J. Camp- 716  
bell, P. Kenney, T. Valleau, O. Morozova, Impact 717  
of close interpersonal contact on covid-19 incidence: 718  
Evidence from 1 year of mobile device data, *Science 719*  
*Advances* 8 (1) (2022) eabi5499. arXiv:[https:// 720](https://www.science.org/doi/pdf/10.1126/sciadv.abi5499)  
[www.science.org/doi/pdf/10.1126/sciadv.abi5499](https://www.science.org/doi/pdf/10.1126/sciadv.abi5499), 721  
doi:10.1126/sciadv.abi5499. 722  
URL [https://www.science.org/doi/abs/10.1126/ 723](https://www.science.org/doi/abs/10.1126/sciadv.abi5499)  
[sciadv.abi5499](https://www.science.org/doi/abs/10.1126/sciadv.abi5499) 724
- [21] E. D. Kolaczyk, *Statistical Analysis of Network Data*, 725  
Springer New York, NY, 2009. doi:[https://doi.org/ 726](https://doi.org/10.1007/978-0-387-88146-1)  
[10.1007/978-0-387-88146-1](https://doi.org/10.1007/978-0-387-88146-1). 727
- [22] P. Hu, W. C. Lau, A survey and taxonomy of graph 728

- 678 sampling, CoRR abs/1308.5865 (2013). arXiv:1308. 730  
679 5865. 731  
680 URL <http://arxiv.org/abs/1308.5865> 732
- [23] M. A. Serrano, M. Boguñá, R. Pastor-Satorras, Correla- 733  
682 tions in weighted networks, Phys. Rev. E 74 (2006) 734  
683 055101. doi:10.1103/PhysRevE.74.055101. 735  
684 URL [https://link.aps.org/doi/10.1103/PhysRevE. 736  
685 74.055101](https://link.aps.org/doi/10.1103/PhysRevE.74.055101) 737
- [24] A. Barrat, M. Barthélemy, R. Pastor-Satorras, 738  
687 A. Vespignani, The architecture of complex weighted 739  
688 networks, Proceedings of the National Academy of 740  
689 Sciences 101 (11) (2004) 3747–3752. arXiv:<https://www.pnas.org/doi/pdf/10.1073/pnas.0400087101>, 741  
690 doi:10.1073/pnas.0400087101. 742  
691 URL [https://www.pnas.org/doi/abs/10.1073/pnas. 743  
692 0400087101](https://www.pnas.org/doi/abs/10.1073/pnas.0400087101) 744
- [25] H. Ebel, L.-I. Mielsch, S. Bornholdt, Scale-free topology 745  
694 of e-mail networks, Phys. Rev. E 66 (2002) 035103. doi: 746  
695 10.1103/PhysRevE.66.035103. 747  
696 URL [https://link.aps.org/doi/10.1103/PhysRevE. 748  
697 66.035103](https://link.aps.org/doi/10.1103/PhysRevE.66.035103) 749
- [26] M. E. J. Newman, Scientific collaboration networks. i. 750  
699 network construction and fundamental results, Phys. 751  
700 Rev. E 64 (2001) 016131. doi:10.1103/PhysRevE.64. 752  
701 016131. 753  
702 URL [https://link.aps.org/doi/10.1103/PhysRevE. 754  
703 64.016131](https://link.aps.org/doi/10.1103/PhysRevE.64.016131) 755
- [27] R. Guimera, S. Mossa, A. Turtschi, L. N. Amaral, 756  
704 The worldwide air transportation network: Anoma- 757  
705 lous centrality, community structure, and cities' global 758  
706 roles, Proceedings of the National Academy of Sciences 759  
707 102 (22) (2005) 7794–7799. 760
- [28] A. Clauset, C. R. Shalizi, M. E. J. Newman, Power-law 761  
710 distributions in empirical data, SIAM Review 51 (4) 762  
711 (2009) 661–703. arXiv:[https://doi.org/10.1137/ 763  
712 070710111](https://doi.org/10.1137/070710111), doi:10.1137/070710111. 764  
713 URL <https://doi.org/10.1137/070710111> 765
- [29] J.-D. J. Han, D. Dupuy, N. Bertin, M. E. Cusick, 766  
714 M. Vidal, Effect of sampling on topology predictions 767  
715 of protein-protein interaction networks, Nature biotech- 768  
716 nology 23 (7) (2005) 839–844. 769  
717
- [30] R. Perline, Strong, weak and false inverse power laws, 770  
718 Statistical Science 20 (1) (2005) 68–88. 771  
719 URL <http://www.jstor.org/stable/20061161> 772
- [31] T. Hale, N. Angrist, R. Goldszmidt, B. Kira, A. Pether- 773  
722 ick, T. Phillips, S. Webster, E. Cameron-Blake, L. Hal- 774  
723 las, S. Majumdar, et al., A global panel database of pan- 775  
724 demic policies (oxford covid-19 government response 776  
725 tracker), Nature human behaviour 5 (4) (2021) 529– 777  
726 538. 778  
727
- [32] C. Betsch, S. Eitze, P. Sprengholz, L. Korn, P. Sham- 780  
728 srizi, M. Geiger, E. Sievert, L. Lehrer, M. Jenny, Zusam- 781  
729 menfassung und empfehlungen welle 69 (2022).  
URL [https://projekte.uni-erfurt.de/cosmo2020/  
web/summary/69/](https://projekte.uni-erfurt.de/cosmo2020/web/summary/69/)
- [33] C. Betsch, L. Wieler, M. Bosnjak, M. Ramharter, 782  
733 V. Stollorz, S. Omer, L. Korn, P. Sprengholz, L. Fel- 734  
735 gendreff, S. Eitze, P. Schmid, Germany covid-19 snap- 736  
737 shot monitoring (cosmo germany): Monitoring knowl- 738  
739 edge, risk perceptions, preventive behaviours, and pub- 740  
741 lic trust in the current coronavirus outbreak in germany 742  
(Mar. 2020). doi:10.23668/psycharchives.2776.  
URL [https://psycharchives.org/index.php/en/  
item/e5acdc65-77e9-4fd4-9cd2-bf6aa2dd5eba](https://psycharchives.org/index.php/en/item/e5acdc65-77e9-4fd4-9cd2-bf6aa2dd5eba) 743
- [34] M. an der Heiden, Sars-cov-2-nowcasting und -r- 744  
745 schatzung (Jan. 2023). doi:10.5281/zenodo.7571376.  
URL <https://doi.org/10.5281/zenodo.7571376> 746
- [35] H. Rossman, E. Segal, Nowcasting the spread of sars- 747  
748 cov-2, Nature microbiology 7 (1) (2022) 16–17. 749
- [36] R. Koch-Institut, Anzahl und anteile von voc und voi 750  
751 in deutschland (2023).  
URL [https://www.rki.de/DE/Content/InfAZ/N/  
Neuartiges\\_Coronavirus/Daten/VOC\\_VOI\\_Tabelle.  
xlsx?\\_\\_blob=publicationFile](https://www.rki.de/DE/Content/InfAZ/N/Neuartiges_Coronavirus/Daten/VOC_VOI_Tabelle.xlsx?__blob=publicationFile) 752
- [37] E. Mathieu, H. Ritchie, L. Rodés-Guirao, C. Appel, 753  
754 C. Giattino, J. Hasell, B. Macdonald, S. Dattani, 755  
756 D. Beltekian, E. Ortiz-Ospina, M. Roser, Coronavirus 757  
758 pandemic (covid-19) (2020).  
URL <https://ourworldindata.org/coronavirus> 759
- [38] H. Neuhauser, N. Buttman-Schweiger, J. Fiebig, 760  
761 C. Poethko-Müller, F. Prütz, G. Sarganas Margolis, 762  
763 R. Thamm, M. Zimmermann, Observatorium serolo- 764  
765 gischer Studien zu SARS-CoV-2 in Deutschland (Sep. 766  
767 2022). doi:10.5281/zenodo.7043025.  
URL <https://doi.org/10.5281/zenodo.7043025> 768
- [39] J. D. Noh, Percolation transition in networks with 769  
770 degree-degree correlation, Phys. Rev. E 76 (2007) 771  
772 026116. doi:10.1103/PhysRevE.76.026116.  
URL [https://link.aps.org/doi/10.1103/PhysRevE. 773  
774 76.026116](https://link.aps.org/doi/10.1103/PhysRevE.76.026116) 775
- [40] S. H. Lee, P.-J. Kim, H. Jeong, Statistical properties 776  
777 of sampled networks, Phys. Rev. E 73 (2006) 016102.  
doi:10.1103/PhysRevE.73.016102.  
URL [https://link.aps.org/doi/10.1103/PhysRevE. 778  
779 73.016102](https://link.aps.org/doi/10.1103/PhysRevE.73.016102) 780
- [41] J. T. Brooks, J. C. Butler, Effectiveness of 781  
782 Mask Wearing to Control Community Spread 783  
784 of SARS-CoV-2, JAMA 325 (10) (2021) 998– 785  
786 999. arXiv:[https://jamanetwork.com/journals/  
jama/articlepdf/2776536/jama\\_1\\_brooks\\_ 787  
788 \\_2021\\_it\\_210006\\_1631033869\\_97869.pdf](https://jamanetwork.com/journals/jama/articlepdf/2776536/jama_1_brooks_2021_it_210006_1631033869_97869.pdf),  
doi:10.1001/jama.2021.1505.  
URL <https://doi.org/10.1001/jama.2021.1505> 789
- [42] F. Balloux, C. Tan, L. Swadling, D. Richard, C. Jenner, 790

- 782 M. Maini, L. van Dorp, The past, current and future 834  
783 epidemiological dynamic of SARS-CoV-2, Oxford Open 835  
784 Immunology 3 (1) (06 2022). arXiv:<https://academic.oup.com/oiim/article-pdf/3/1/iqac003/48744431/iqac003.pdf>, doi:10.1093/oxfimm/iqac003. 836  
785 URL <https://doi.org/10.1093/oxfimm/iqac003> 837  
786 [43] G. P. Guy Jr, F. C. Lee, G. Sunshine, R. McCord, 838  
787 M. Howard-Williams, L. Kompaniyets, C. Dunphy, 839  
788 M. Gakh, R. Weber, E. Sauber-Schatz, et al., Asso- 840  
789 ciation of state-issued mask mandates and allowing on- 841  
790 premises restaurant dining with county-level covid-19 842  
791 case and death growth rates—united states, march 1– 843  
792 december 31, 2020, Morbidity and Mortality Weekly 844  
793 Report 70 (10) (2021) 350. 845  
794 [44] D. K. Chu, E. A. Akl, S. Duda, K. Solo, S. Yaacoub, 846  
795 H. J. Schünemann, D. K. Chu, E. A. Akl, A. El-harakeh, 847  
796 A. Bognanni, T. Lotfi, M. Loeb, A. Hajizadeh, A. Bak, 848  
797 A. Izcovich, C. A. Cuello-Garcia, C. Chen, D. J. Har- 849  
798 ris, E. Borowiack, F. Chamseddine, F. Schünemann, 850  
799 G. P. Morgano, G. E. U. Muti Schünemann, G. Chen, 851  
800 H. Zhao, I. Neumann, J. Chan, J. Khabsa, L. Hneiny, 852  
801 L. Harrison, M. Smith, N. Rizk, P. Giorgi Rossi, P. Abi- 853  
802 Hanna, R. El-khoury, R. Stalteri, T. Baldeh, T. Piggott, 854  
803 Y. Zhang, Z. Saad, A. Khamis, M. Reinap, S. Duda, 855  
804 K. Solo, S. Yaacoub, H. J. Schünemann, Physical dis- 856  
805 tancing, face masks, and eye protection to prevent 857  
806 person-to-person transmission of sars-cov-2 and covid- 858  
807 19: a systematic review and meta-analysis, The Lancet 859  
808 395 (10242) (2020) 1973–1987. doi:[https://doi.org/10.1016/S0140-6736\(20\)31142-9](https://doi.org/10.1016/S0140-6736(20)31142-9). 860  
809 URL <https://www.sciencedirect.com/science/article/pii/S0140673620311429>  
810 [45] R. Koch-Institut, *Survstat@rki* 2.0 (2023).  
811 URL <https://survstat.rki.de/>  
812 [46] J. P. Townsend, A. D. Lamb, H. B. Hassler, 813  
814 P. Sah, A. A. Nishio, C. Nguyen, A. D. Tew, 815  
816 A. P. Galvani, A. Dornburg, Projecting the sea- 817  
818 sonality of endemic covid-19, medRxiv (2022). 818  
819 arXiv: <https://www.medrxiv.org/content/early/2022/10/07/2022.01.26.22269905.full.pdf>, doi:10. 819  
820 1101/2022.01.26.22269905. 820  
821 URL <https://www.medrxiv.org/content/early/2022/10/07/2022.01.26.22269905>  
822 [47] V. Sekara, A. Stopczynski, S. Lehmann, Fun- 823  
824 damental structures of dynamic social networks, 824  
825 Proceedings of the National Academy of Sciences 825  
826 113 (36) (2016) 9977–9982. arXiv: <https://www.pnas.org/doi/pdf/10.1073/pnas.1602803113>, 826  
827 doi:10.1073/pnas.1602803113. 827  
828 URL <https://www.pnas.org/doi/abs/10.1073/pnas.1602803113>  
829 [48] P. Holme, J. Saramäki, Temporal networks, Physics Re- 829  
830 ports 519 (3) (2012) 97–125, temporal Networks. doi: 830  
831 <https://doi.org/10.1016/j.physrep.2012.03.001>. 831  
832 URL <https://www.sciencedirect.com/science/article/pii/S0370157312000841>  
833 [49] J. Enright, R. R. Kao, Epidemics on dynamic networks, 833  
834 Epidemics 24 (2018) 88–97. doi:<https://doi.org/10.1016/j.epidem.2018.04.003>. 834  
835 URL <https://www.sciencedirect.com/science/article/pii/S1755436518300173>  
836 [50] E. Valdano, L. Ferreri, C. Poletto, V. Colizza, An- 836  
837 alytical computation of the epidemic threshold on 837  
838 temporal networks, Phys. Rev. X 5 (2015) 021005. 838  
839 doi:10.1103/PhysRevX.5.021005. 839  
840 URL <https://link.aps.org/doi/10.1103/PhysRevX.5.021005>  
841 [51] X. Zhang, C. Moore, M. E. Newman, Random graph 841  
842 models for dynamic networks, The European Physical 842  
843 Journal B 90 (10) (2017) 1–14. 843  
844 [52] N. Pitsianis, D. Floros, A.-S. Iliopoulos, X. Sun, Sg- 844  
845 t-sne- $\pi$ : Swift neighbor embedding of sparse stochastic 845  
846 graphs, Journal of Open Source Software 4 (39) (2019) 846  
847 1577. 847  
848 [53] N. Pitsianis, A.-S. Iliopoulos, D. Floros, X. Sun, Space- 848  
849 land embedding of sparse stochastic graphs, in: 2019 849  
850 IEEE High Performance Extreme Computing Confer- 850  
851 ence (HPEC), 2019, pp. 1–8. doi:10.1109/HPEC.2019. 851  
852 8916505. 852

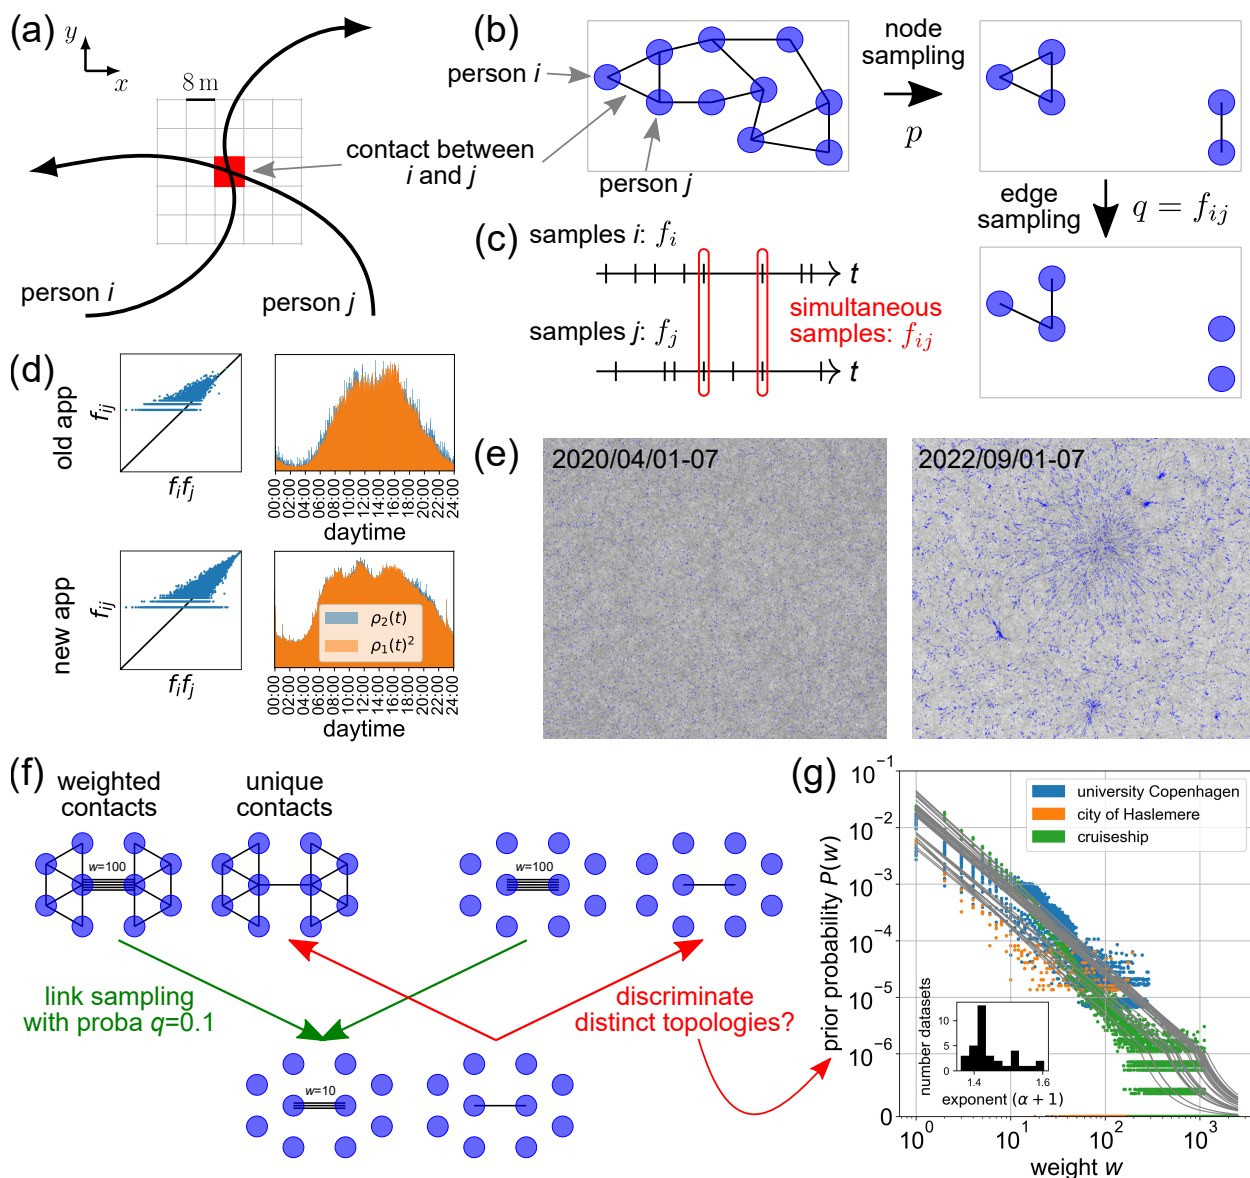

Figure 1: **Contact networks: definition, measurement and inference.** (a) Co-location of 2 (or more) devices  $i$  and  $j$  within the same  $8\text{ m} \times 8\text{ m}$  cell within 2 min defines a contact. (b) In the network, pairs of individuals/mobile devices (nodes) are connected by their contacts (edges). The network sampling induced by the data collection app retains nodes with proba  $p$  (incl. links between pairs of retained nodes), reflective of the population share of app users. Subsequently, links are retained with proba  $q$ . (c) Ticks along the time axes indicate samples from a pair of devices  $i$  and  $j$ .  $q$  depends on the likelihood  $f_{ij}$  of simultaneous samples (red encircled samples), a necessary condition to observe a contact between them. (d) Comparison between actual simultaneous sample rates  $f_{ij}$  and those predicted from uncorrelated single-device sample rates  $f_i f_j$  (left panel) and between the distribution of simultaneous samples over the day  $\rho_2(t)$  with the squared distribution of single-device samples  $\rho_1(t)^2$  (right panel). (e) Examples of 7-day aggregated networks under lockdown (Apr 2020) and unrestricted (Sep 2022) conditions. Blue dots represent individuals, gray links the contacts. Zoom over a 2D embedding using SG-t-SNE-II [52, 53]. (f) In weighted contact networks, links are weighted by the duration/multiplicity of contact  $w_{ij} \in \{0, 1, 2, \dots\}$  between nodes  $i$  and  $j$ , while unique contact networks only distinguish between presence or absence of contact,  $a_{ij} \in \{0, 1\}$ . Example of information loss upon link sampling: Networks with distinct topologies (left vs. right set of networks) can yield similar sample networks (bottom networks) upon the same sampling process (green arrows). Discriminating distinct original networks from the sample network (red arrows) thus requires additional information. (g) Prior information is extracted from weight distributions  $P(w)$  found in complete contact networks [17, 18, 19].

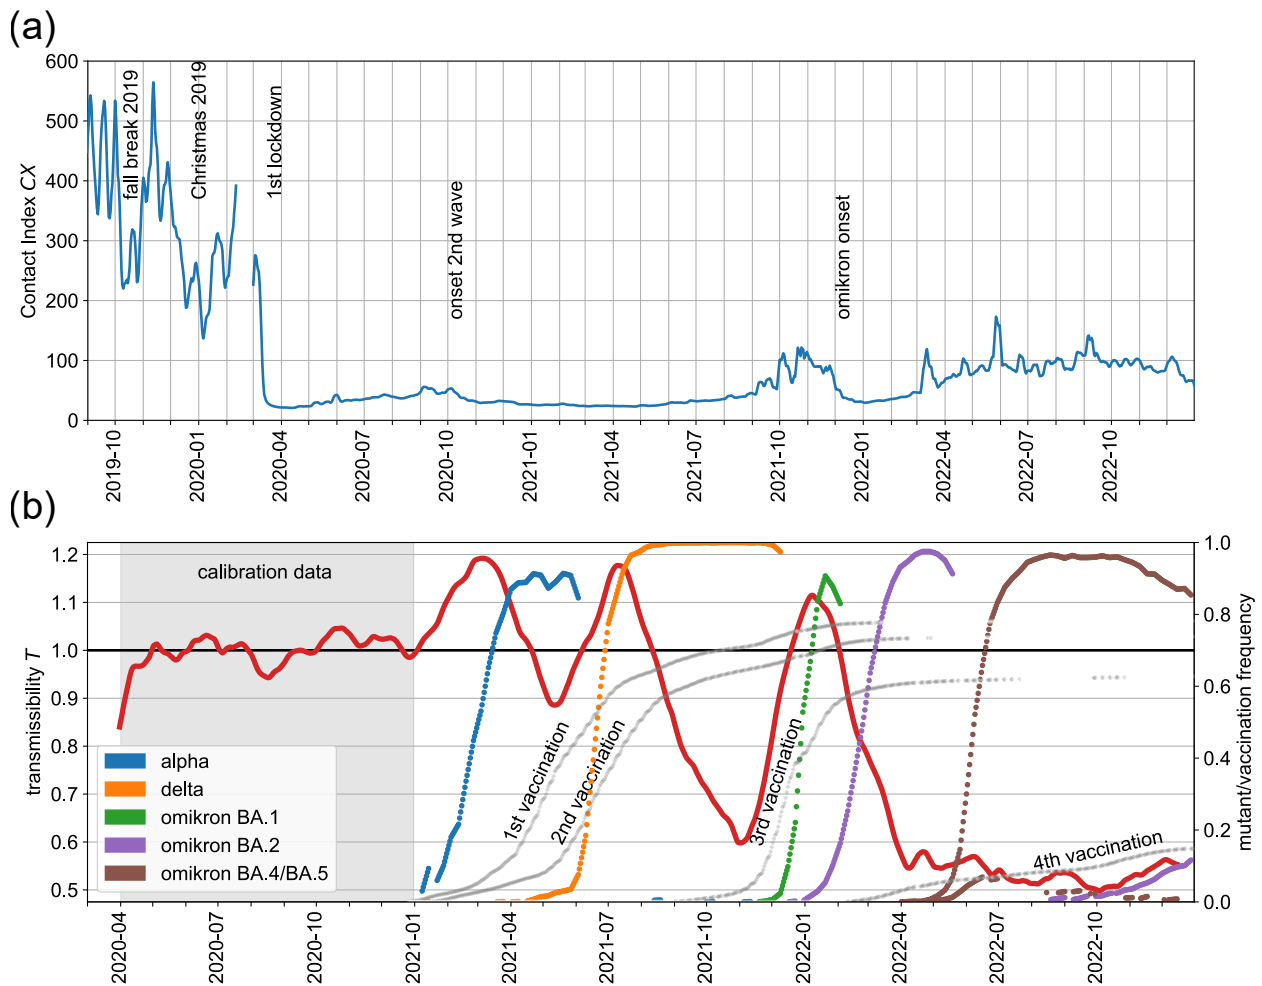

**Figure 2: Real-time observation of driving forces in SARS-CoV-2 epidemics: contact levels and relative transmissibility.** (a) Evolution of the Contact Index  $CX = \langle k^2 \rangle / \langle k \rangle$  in Germany over the course of > 3 years (2019-2022), carrying the signature of various collective behaviour changes in response to the epidemic situation (as indicated). The gap in February 2022 is explained by a major app update. (b) The slowly varying relative transmissibility  $\langle T \rangle(t)$  (red) quantifying the intrinsic efficiency of SARS-CoV-2 transmission, measured from the ratio of reproduction numbers ( $R_{\text{eff}}$ ) and contact levels ( $CX$ ), see Eq. (3). The gray-shaded time interval is wild-type dominated and was used to calibrate  $CX$  from our crowd-sourcing method and  $R_{\text{eff}}$  from infection surveillance (Figure S1(a, inset)). The rising frequencies of key SARS-CoV-2 immune escape variants (colored lines, see legend) and well as of vaccine status in Germany (light gray lines) are shown (right axis).



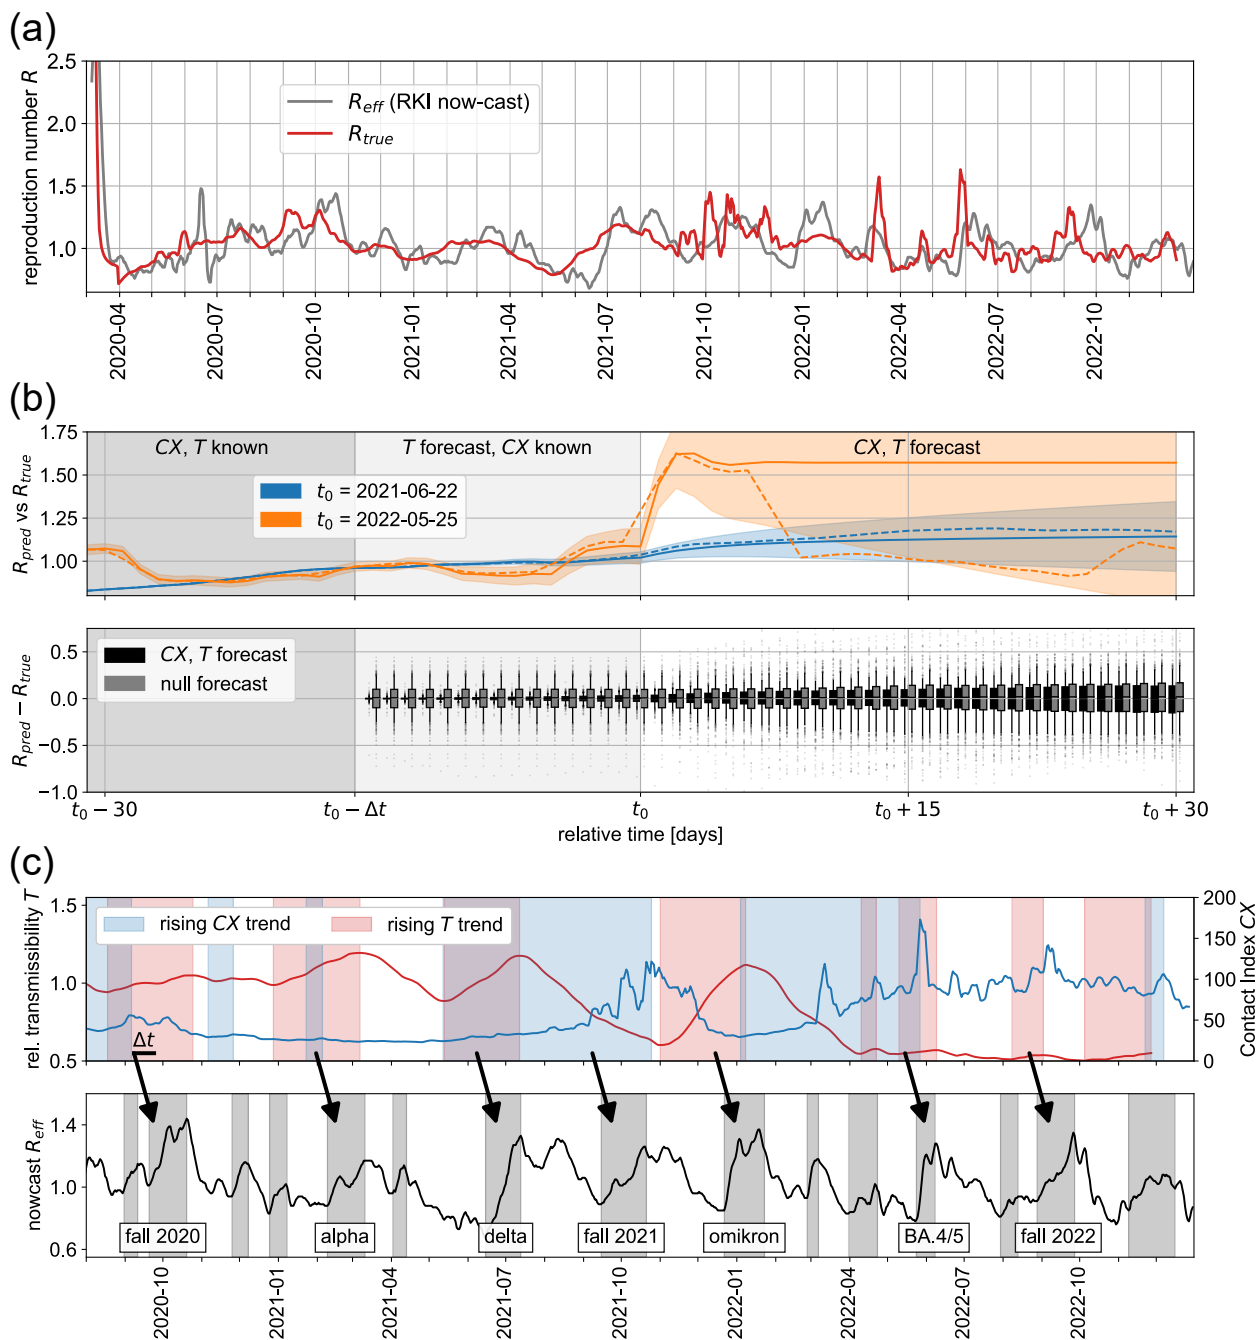

**Figure 3: Forecast of reproduction numbers and trends from contact and transmissibility levels. (a)** Comparison of SARS-CoV-2 effective reproduction numbers  $R_{eff}$  from infection surveillance (gray) and projected  $R_{true}$  using Eq. (4) (red). All reproduction numbers are assigned to their day of recording. **(b, upper panel)** Forecast  $R_{pred}$  of current and future SARS-CoV-2 reproduction numbers and their uncertainties (solid lines and shaded bands, respectively) using Eq. (4) and the  $CX$  and  $\langle T \rangle$  time series. Comparison with actual  $R_{true}$  values (dashed lines). Denoting the current day by  $t_0$ ,  $R_{eff}$  and  $\langle T \rangle$  are available up to  $t_0 - \Delta t$ , while  $CX$  is near real-time (available up to  $t_0$ ); the time series are projected beyond their last time points using ARIMA models. The forecast is shown for different choices of the current day  $t_0$  (see legend). **(b, lower panel)** The distribution of residuals between forecasted  $R_{pred}$  and actual  $R_{true}$  values over all choices of  $t_0$  over the course of 2 years (black box plots). Comparison to residuals from null projections of  $R_{eff}$  that make no use of  $CX$  (gray box plots), i.e. simple ARIMA model-based projection of infection surveillance data. The boxes indicate quartiles, while whiskers cover 90% of the data. **(c)** Identification of rising trends in both contact levels and transmission efficiency (upper panel) and their relation to rising trends in  $R_{eff}$  (lower panel).
