# Supplementary material for: Real-time Dissection and Forecast of Infection Dynamics during a Pandemic
Source: bioRxiv or medRxiv preprint supplement (doi:10.1101/2023.03.02.23286502), 2023-07-25
Supplement: Supplementary file [file media-1.pdf]

# SUPPLEMENTARY INFORMATION

## Real-time Dissection and Forecast of Infection Dynamics during a Pandemic

Steven Schulz<sup>a,\*</sup>, Richard Pastor<sup>a</sup>, Cenk Koyuncuoglu<sup>a</sup>, Forrest W. Crawford<sup>b,c,d,e</sup>, Detlef Zernick<sup>a</sup>,  
André Karch<sup>f</sup>, and Sten Rüdiger<sup>a</sup>

<sup>a</sup>*Machine Learning and Health Unit, Department of Engineering, NET CHECK GmbH, Berlin, Germany*

<sup>b</sup>*Department of Biostatistics, Yale School of Public Health, New Haven, CT, USA*

<sup>c</sup>*Department of Statistics and Data Science, Yale University, New Haven, CT, USA*

<sup>d</sup>*Department of Ecology and Evolutionary Biology, Yale University, New Haven, CT, USA*

<sup>e</sup>*Yale School of Management, New Haven, CT, USA*

<sup>f</sup>*Institute of Epidemiology and Social Medicine, Westfälische Wilhelms-Universität Münster, Münster, Germany*

---

### 1 Contents

|    |                                                                                                                    |           |
|----|--------------------------------------------------------------------------------------------------------------------|-----------|
| 2  | <b>S1 Definition of contact networks and reconstruction from GPS crowdsourcing data</b>                            | <b>1</b>  |
| 3  | <b>S2 Estimation of <math>CX</math> from contact network samples</b>                                               | <b>3</b>  |
| 4  | S2.1 Problem statement . . . . .                                                                                   | 3         |
| 5  | S2.2 The sampling process induced by the crowdsourcing app . . . . .                                               | 3         |
| 6  | S2.3 Horvitz-Thompson estimation of $CX$ from network samples . . . . .                                            | 4         |
| 7  | S2.4 Computing the edge sampling probability $q$ for unique contacts . . . . .                                     | 5         |
| 8  | <b>S3 Spatial heterogeneity</b>                                                                                    | <b>8</b>  |
| 9  | S3.1 Correcting for spatially heterogeneous sampling: the role of soccer stadiums . . . . .                        | 8         |
| 10 | S3.2 Spatially heterogeneous contact patterns . . . . .                                                            | 10        |
| 11 | <b>S4 Determining and analyzing relative transmissibility <math>\langle T \rangle</math> using <math>CX</math></b> | <b>10</b> |
| 12 | S4.1 Calibration of $R$ and $CX$ using 2020-specific data . . . . .                                                | 10        |
| 13 | S4.2 Relative transmissibility: overall dynamics less the contacts . . . . .                                       | 11        |
| 14 | S4.3 Confounding: correlation of $\langle T \rangle$ with other time series . . . . .                              | 11        |
| 15 | <b>S5 Epidemic forecast</b>                                                                                        | <b>12</b> |
| 16 | S5.1 SARS-CoV-2 . . . . .                                                                                          | 12        |
| 17 | S5.2 Influenza . . . . .                                                                                           | 13        |

### 18 S1. Definition of contact networks and reconstruction from GPS crowdsourcing data

19 To achieve a computationally feasible definition and identification of contacts, we divide space-time into  
20 tiles of  $8\text{ m} \times 8\text{ m}$  and 2 min in size. In other words, the geographical area of interest (here: map of Germany)

---

\*Corresponding author: [steven.schulz@netcheck.de](mailto:steven.schulz@netcheck.de).

is binned into 8 m-by-8 m tiles and the time axis is binned into contiguous intervals of 2 min. We define a contact event as the co-location of two or more devices within the same tile, i.e. when  $\geq 2$  individuals are close in space at about the same time such that airborne transmission between them is possible. We infer co-location events in Germany using crowdsourced GPS location information from a panel of approximately  $10^6$  app users, each of which contributing on average 100 daily samples, thus giving rise to a daily raw dataset of the order of  $10^8$  samples and 300 GB in size. The choice of 2 min is motivated from the expectation that exhaled, infectious droplets can linger in the air for substantial time after passage of an infectious individual.

The use of co-location within two-dimensional grid cells of  $8\text{ m} \times 8\text{ m}$  excludes actual contacts between nearby individuals that are separated by cell boundaries. However, we think this represents an additional benefit to our approach while simplifying the definition of contacts: This exclusion effect induces a kernel with higher likelihood for a relevant contact on short-distanced pairs of individuals, as they are more likely to fall within the same grid cell. This meets the expectation that transmission probability is also a continuously decreasing function of distance.

We define the contact network as follows: Individuals/devices are implanted as nodes of a network and edges are drawn between any pair of individuals/devices whenever these devices are found to be in contact with each other, see Figure S3(a). To obtain a day-specific contact network, we aggregate all contact events observed on that given day to build such a contact network. The mechanism of drawing edges in the contact network can take on two flavours: 1) A new edge is drawn for each, even repeated pair of individuals. Here, the number of edges between any pair  $i$  and  $j$  or, equivalently, the edge weight  $w_{ij} \in \{0, 1, 2, \dots\}$  between them represents the number of recurrences or the total duration of contact. We refer to such contact networks as *non-unique* contact networks (Figure S3(c)). 2) A single, unweighted edge is drawn between any pair of devices found to be in contact, regardless of the number of recurrences within a day, to obtain *unique* contact networks. At most one link is possible between any pair of devices and weights  $a_{ij}$  can only take on  $a_{ij} \in \{0, 1\}$ . Overall, we here exclude “self-contacts”, i.e.  $w_{ii} = a_{ii} = 0$  for all nodes  $i$ .

In the context of epidemics, we think that the number of unique contacts is most relevant: For instance, given  $w$  contacts for a particular person, it matters whether a contact with a fixed partner is repeated  $w$  times or whether these stem from single contacts with  $w$  distinct contact partners. The latter situation arises to higher transmission potential. In other words, rather than the number of (non-unique) contacts in the network, it matters how these are distributed across the population and define its network topology. For the computation of the Contact Index  $CX = \frac{\langle k^2 \rangle}{\langle k \rangle}$ , we therefore focus on unique contact numbers  $k_i = \sum_j a_{ij}$  where  $a_{ij} \in \{0, 1\}$ . However, unique contact networks and their scaling upon network sampling is mathematically more intricate, as portrayed in Section S2.

Finally, we assume contact networks to be undirected, i.e. that infection is equally likely to occur in both directions between any pair of devices in contact. We thus neglect potential asymmetries of network links arising from the temporal order of passage of individuals at a location, as a first individual passing can result in the infection of a second, subsequent individual passing, but not vice versa by a causality argument. Since we only allow for temporal delays of up to 2 min, we expect these asymmetries to be neglectable.

## S2. Estimation of $CX$ from contact network samples

### S2.1. Problem statement

The Contact Index  $CX = \frac{\langle k^2 \rangle}{\langle k \rangle}$ , introduced and motivated in the main text, requires estimating the first two moments of the distribution of unique contact numbers in the contact network  $G$  with  $N$  nodes

$$\begin{aligned}\langle k \rangle &= \frac{1}{N} \sum_{i \in G} k_i = \frac{1}{N} \sum_{ij \in G} a_{ij}, \\ \langle k^2 \rangle &= \frac{1}{N} \sum_{i \in G} k_i^2 = \frac{1}{N} \sum_{ij\ell \in G} a_{ij} a_{i\ell},\end{aligned}\tag{S1}$$

where  $k_i = \sum_{j \in G} a_{ij}$  is the unique contact number (degree) of node  $i$  and  $a_{ij} \in \{0, 1\}$  are the adjacency matrix elements capturing the presence or absence of a link between nodes  $i$  and  $j$ . The challenge resides in the fact that only a small fraction of all actual contacts are captured and recorded by our crowdsourcing approach; reconstructed contact networks thus represent samples of the complete population network of interest where most nodes and links have been removed [1, 2]. We use an approach based on Horvitz-Thompson network sampling theory [1] and topological information from complete contact networks in the literature [3, 4, 5] to correct for sampling effects.

### S2.2. The sampling process induced by the crowdsourcing app

The nature of our reconstructed contact networks as samples of the actual object of interest stems from several aspects inherent to our GPS crowdsourcing method. Specifically, mobile device users install an app and opt in to the creation of samples including time and GPS location information, in response to certain triggers such as motion or activity on the phone. (i) Only a fraction of the population elects to install the app and are thus able to contribute (node sampling), thus giving rise to a panel of approximately 1 million users in Germany out of a population of 83 million. (ii) Participating individuals do not send samples continuously in time, but only occasionally upon trigger events (edge sampling). As a result, most real-world contact events go undetected.

The emerging mathematical picture of the network sampling process induced by the crowdsourcing app is shown in Figure S3(a): An initial node sampling step retains only nodes which have the app installed on their device, which occurs with probability  $p \approx 0.01$ . Edges between retained nodes are also retained. Second, an additional edge sampling step retains only those edges where both involved devices create a sample during the contact; the simultaneity of samples (modulo 2 min) from different devices (Figure S3(b)) is a necessary condition for the recording of contacts and occurs with probability  $q$ .

The sampling parameters  $p$  and  $q$  are not constant, as app usage as well as trigger events for sample creation are subject to change over time. To achieve a persistent measurement of daily contact network statistics such as  $CX$ , the statistics obtained from network samples must be scaled by daily values of  $p$  and  $q$ . Most importantly,  $q$  is strongly affected by app updates, but previous modeling [6] is restricted to the node sampling part of the overall sampling process. In consequence, time series covering extended periods of time (3 years in this paper) represent a convolution of actual changes in contact networks in response to e.g. lockdowns and spurious changes inflicted by events unrelated to contact behaviour. Correcting these time series for app usage and software-related effects is key towards properly measuring actual epidemic factors.

92 Higher-order sampling effects, such as changes in phone usage in synchrony with contact behaviour  
 93 changes as daily routines change, are not captured by our approach.

### 94 *S2.3. Horvitz-Thompson estimation of CX from network samples*

95 Using Horvitz-Thompson network sampling theory, we here derive the relationship between the Contact  
 96 Index  $CX$  of the complete network  $G$  and its counterpart  $CX^*$  in a sample  $G^*$  of this network obtained  
 97 through the sampling process described above. Observables  $\mathcal{O}$  ( $\mathcal{O}^*$ ) in  $G$  ( $G^*$ ) are denoted without (with)  
 98 an asterisk. The theory states that, for any edge observable  $\mathcal{O}_{ij}$ , we have that in expectation [1]

$$\sum_{ij \in G} \mathcal{O}_{ij} = \sum_{ij \in G^*} \frac{\mathcal{O}_{ij}^*}{\pi_{ij}}, \quad (\text{S2})$$

99 where  $\pi_{ij}$  is the probability of retaining the edge between nodes  $i$  and  $j$  upon sampling the original network.

100 For the moments  $\langle k \rangle$  and  $\langle k^2 \rangle$  in the complete network, we thus find

$$\langle k \rangle = \frac{1}{N} \sum_{i \in G} k_i = \frac{1}{N} \sum_{ij \in G} a_{ij} = \frac{1}{N} \sum_{ij \in G^*} \frac{a_{ij}^*}{p_i p_j q_{ij}} \quad (\text{S3})$$

101 and

$$\langle k^2 \rangle = \frac{1}{N} \sum_{i \in G} k_i^2 = \frac{1}{N} \sum_{ij\ell \in G} a_{ij} a_{i\ell} = \frac{1}{N} \sum_{ij \neq \ell \in G^*} \frac{a_{ij}^* a_{i\ell}^*}{p_i p_j q_{ij} p_\ell q_{i\ell}} + \frac{1}{N} \sum_{ij \in G^*} \frac{a_{ij}^*}{p_i p_j q_{ij}}, \quad (\text{S4})$$

102 where the last equality in each case applies Eq. (S2) to the adjacency matrix entries  $\mathcal{O}_{ij} = a_{ij}$ . The overall  
 103 probability of retaining a single edge reads  $\pi_{ij} = p_i p_j q_{ij}$  as used in Eq. (S3); it requires both retaining the  
 104 nodes (with probabilities  $p_i$  and  $p_j$ ) and subsequently the edge itself (with probability  $q_{ij}$ ). In Eq. (S4), we  
 105 split the sum into terms where  $j \neq \ell$  and  $j = \ell$ : In the former case, a second edge between  $i$  and  $\ell$  needs to  
 106 be retained (with conditional probability  $\pi_{i\ell} = p_\ell q_{i\ell}$ ) after a first edge between  $i$  and  $j$  has been retained  
 107 (again with probability  $\pi_{ij} = p_i p_j q_{ij}$ ).

108 Thus, assuming uniform sampling parameters  $p_i \equiv p$  and  $q_{ij} \equiv q$  across the network, which implies that  
 109 the number of nodes scales as  $N^* = pN$ , we have

$$\langle k \rangle = \frac{1}{N p^2 q} \sum_{i \in G^*} k_i^* = \frac{1}{p q} \frac{1}{N^*} \sum_{i \in G^*} k_i^* = \frac{\langle k^* \rangle^*}{p q} \quad (\text{S5})$$

110 and

$$\begin{aligned} \langle k^2 \rangle &= \frac{1}{N p^3 q^2} \sum_{i \in G^*} k_i^* (k_i^* - 1) + \frac{1}{N p^2 q} \sum_{i \in G^*} k_i^* \\ &= \frac{1}{p^2 q^2} \frac{1}{N^*} \sum_{i \in G^*} k_i^* (k_i^* - 1) + \frac{1}{p q} \frac{1}{N^*} \sum_{i \in G^*} k_i^* \\ &= \frac{\langle k^{*2} \rangle^* - \langle k^* \rangle^*}{p^2 q^2} + \frac{\langle k^* \rangle^*}{p q}, \end{aligned} \quad (\text{S6})$$

111 where  $\langle \cdot \rangle^*$  denotes the average taken within the sample network. As a result, the Contact Index  $CX$  is

112 estimated as

$$CX = \frac{\langle k^2 \rangle}{\langle k \rangle} = 1 + \frac{1}{pq} \left( \frac{\langle k^{*2} \rangle^*}{\langle k^* \rangle^*} - 1 \right) = 1 + \frac{CX^* - 1}{pq}. \quad (\text{S7})$$

113 Upon setting  $q = 1$ , we recover previous results [6] without the additional edge sampling step once the nodes  
114 have been sampled.

115 The node sampling probability  $p = \frac{N^*}{N}$  is simply given by the population share participating in the  
116 crowdsourcing and the probability of retaining non-unique contact links  $q$  by the rate of simultaneous samples  
117 between pairs of nodes; both devices must create samples at the same time (modulo 2 min). Assuming that  
118 in the 2 min-interval  $t$  ( $t = 1, 2, \dots, T = 720$  for a day of  $720 \cdot 2 \text{ min} = 1440 \text{ min}$ )  $N^*(t) \leq N^*$  devices among  
119 the  $N^*$  observed over the full day are active, we take

$$q = \left\langle \frac{N^*(t)(N^*(t) - 1)}{N^*(N^* - 1)} \right\rangle_t = \frac{1}{T} \sum_{t=1}^T \frac{N^*(t)(N^*(t) - 1)}{N^*(N^* - 1)}, \quad (\text{S8})$$

120 i.e., the average fraction of device pairs with simultaneous pings among all possible pairs. Eq. (S8) uses  
121 the fact that at any given time  $t$ , devices have uncorrelated activity patterns, i.e. they create samples  
122 independently from one another (Figure S3(e)). Note, however, that there is a systematic variation in the  
123 number of active numbers  $N^*(t)$  over the day, namely that devices are more active during daytime than at  
124 night (Figure S3(e)). By taking averages over the day, we expect to slightly underestimate the true  $q$ , as  
125 this collective daily activity pattern induces correlation between devices (Figure S3(e)).

126 In the case of unique contact networks relevant to our purposes, however, inferring original network  
127 properties from samples comes with its own intricacies because of structural information loss, as discussed  
128 hereafter.

#### 129 *S2.4. Computing the edge sampling probability $q$ for unique contacts*

130 Contact numbers in unique versus non-unique contact networks have different interpretations [7]: The  
131 non-unique case comprises all contacts, including repeated ones, regardless of how they are distributed across  
132 the network. In contrast, the unique case counts pairs connected by any number of contacts and, as such,  
133 focuses on the topological features of the network. Horvitz-Thompson theory appears to be limited to the  
134 non-unique counts: Its success in connecting contact counts between original and sample networks relies on  
135 the independent nature of edge sampling – each of  $w_{ij}$  non-unique edges between nodes  $i$  and  $j$  is sampled  
136 independently with probability  $q$ . It fails for unique contacts because of a coupling effect: In order for a  
137 unique link to be retained upon sampling, at least one among  $w_{ij} > 0$  non-unique links must be retained.  
138 However, we can rescue Horvitz-Thompson theory by considering independent survival of unique links with  
139 an effective edge sampling probability  $q_{\text{eff}}$  (multilink density). Denoting by  $w^*$  the remaining number of  
140 non-unique links after sampling ( $0 \leq w_{ij}^* \leq w_{ij}$ ), this probability is given by

$$q_{\text{eff}} = P(w^* > 0 | w > 0) = \frac{P(w^* > 0)}{P(w > 0)}, \quad (\text{S9})$$

141 where  $P(w)$  defines a weight distribution in the network, i.e. the probability that a pair of nodes is connected  
142 by  $w$  non-unique links.

143 The failure to infer original network properties from samples can be intuited by the destruction of  
144 structural network information upon edge sampling: Figure S3(c) illustrates how two networks with similar  
145 non-unique edge number but distinct topologies lead to similar sample networks upon edge sampling (green  
146 arrows). In consequence, the distinct original network topologies are indistinguishable from the sample as  
147 only source of information (red arrows) [8]. This topological information loss is also reflected by the non-  
148 injective relation between unique and non-unique weights,  $a_{ij} = \text{sgn}(w_{ij})$ ; while the non-unique edge count  
149  $w_{ij} > 0$  indicates the presence of a unique link  $a_{ij} > 0$ , the reverse is not true.

150 Eq. (S9) reveals that  $q_{\text{eff}}$  explicitly depends on unknown properties of the original network  $P(w)$ , which  
151 is where the missing structural information steps in. In consequence, the sampling parameter  $q_{\text{eff}}$  is not  
152 fully determined by the crowdsourcing data, but requires additional knowledge about structural features of  
153 population-wide contact networks. To fill the gap, we devise a Bayesian approach in combination with prior  
154 information from *complete* contact networks reported in the literature [3, 4, 5]. We observe a common shape  
155 of  $P(w|w > 0)$  (Figure S3(d)) across a variety of contexts (cruiseship, university campus, small city), thus  
156 suggesting universal topological features in human contact networks also applicable as prior information to  
157 our case.

158 The cruiseship dataset provides the durations of all contact events between all pairs of individuals for  
159 4 cruises of total duration of 37 h each, applying a 2 m proximity threshold to define a contact. We define  
160 the weight for a given pair as the (rounded) cumulative number of 2 min intervals spent in contact. The  
161 city dataset records all encounters within 50 m between any two individuals from a sample of 4 % of the city  
162 population on 3 consecutive days between 7am and 11pm, but not the duration of encounter. Similarly, the  
163 university dataset records all encounters between members of the freshmen class within 5 – 10 m over the  
164 course of 28 days. While there is population sampling in the latter two datasets, the data is complete in a  
165 sense that within the population sample all contacts are systematically recorded (i.e., no edge sampling).  
166 For each day, we define the weights as the number of encounters between pairs of individuals.

167 More precisely, all weight distributions appear to be well fitted by zeta distributions (i.e. discrete power-  
168 law distributions),  $P(w|w > 0) = w^{-(1+\alpha)}/\zeta(1+\alpha)$ ,  $\alpha > 0$  with exponents  $\alpha$  inferred through maximum  
169 log-likelihood maximization using the log-likelihood function

$$\mathcal{L}(\alpha) = - \sum_{w>0} N(w) [\ln(\zeta(1+\alpha)) + (1+\alpha) \ln(w)], \quad (\text{S10})$$

170 where  $N(w)$  is the number of links in the network with weight  $w$  and  $\zeta(\cdot)$  is the Riemann zeta function.  
171 The equation  $\frac{\partial \mathcal{L}}{\partial \alpha}(\hat{\alpha}) = 0$  then has approximate solution [9]

$$\hat{\alpha} \approx \left( \frac{\sum_{w>0} N(w) \ln(w)}{\sum_{w>0} N(w)} + \ln(2) \right)^{-1}. \quad (\text{S11})$$

172 The distribution of values for  $\alpha$  across all daily networks is shown in the inset of Figure S3(d). Note that we do  
173 not assert by our analysis that power laws are the true mechanism behind the observed networks [9, 8, 10].  
174 Rather, we will use this model and its topological information as an approximate representation of the  
175 observed networks to perform the normalization of the sampling parameter  $q$ . More precisely, we will use  
176 a discrete power-law prior distribution  $P_0(w|w > 0)$  in the following. Also note that  $P_0(w = 0)$  is excluded  
177 because the density of the network  $(1 - P_0(w))$  is expected to be vastly different between spatially confined

178 and spatially extended contact networks.

179 To express  $q_{\text{eff}}$  in terms of  $q$  and the prior distribution  $P_0(w)$ , we use the binomial distribution connecting  
180  $w$  and  $w^*$ ,

$$P(w^*|w) = \binom{w}{w^*} q^{w^*} (1-q)^{w-w^*}, \quad (\text{S12})$$

181 as well as a Bayesian update equation for  $P(w)$ ,

$$P(w) = \sum_{w^* \geq 0} P(w|w^*)P(w^*) = \sum_{w^* \geq 0} \frac{P(w^*|w)P_0(w)}{P_0(w^*)}P(w^*), \quad (\text{S13})$$

182 where the second equality makes use of the Bayesian theorem  $P(w^*|w)P(w) = P(w|w^*)P(w^*)$ . Evaluating  
183 the update equation at  $w = 0$  and using  $P(w = 0|w^*) = \delta_{w^*0}$  as per the binomial distribution shows that

$$P(w = 0)P_0(w^* = 0) = P_0(w = 0)P(w^* = 0). \quad (\text{S14})$$

184 Because of the following series of equalities,

$$\begin{aligned} P(w > 0)P_0(w^* > 0) &= (1 - P(w = 0))(1 - P_0(w^* = 0)) \\ &= 1 - P(w = 0) - P_0(w^* = 0) + P(w = 0)P_0(w^* = 0) \\ &= 1 - P(w = 0) - P_0(w^* = 0) + P_0(w = 0)P(w^* = 0) \\ &= 1 - P_0(w = 0) - P(w^* = 0) + P_0(w = 0)P(w^* = 0) \\ &\quad + [P_0(w = 0) - P(w = 0)] + [P(w^* = 0) - P_0(w^* = 0)] \\ &= (1 - P_0(w = 0))(1 - P(w^* = 0)) \\ &\quad + [P_0(w = 0) - P(w = 0)] + [P(w^* = 0) - P_0(w^* = 0)] \\ &= P_0(w > 0)P(w^* > 0) \\ &\quad + [P_0(w = 0) - P(w = 0)] + [P(w^* = 0) - P_0(w^* = 0)], \end{aligned} \quad (\text{S15})$$

185 where the second equality makes use of Eq. (S14), we imply that

$$\begin{aligned} P(w > 0)P_0(w^* > 0) &= P_0(w > 0)P(w^* > 0) + [P_0(w = 0) - P(w = 0)] \\ &\quad + [P(w^* = 0) - P_0(w^* = 0)]. \end{aligned} \quad (\text{S16})$$

186 Thus, under the assumption that the prior and actual networks are similarly dense, i.e.  $|P(w^{(*)} = 0) -$   
187  $P_0(w^{(*)} = 0)| \ll 1$ , we can neglect the terms in brackets [...] in Eq. (S16) to obtain

$$\begin{aligned} q_{\text{eff}} &= \frac{P(w^* > 0)}{P(w > 0)} \approx \frac{P_0(w^* > 0)}{P_0(w > 0)} = \frac{1 - P_0(w^* = 0)}{P_0(w > 0)} = \sum_{w > 0} \frac{P_0(w)}{P_0(w > 0)} [1 - (1-q)^w] \\ &= \sum_{w > 0} P_0(w|w > 0) [1 - (1-q)^w] = \sum_{w > 0} \frac{w^{-(1+\alpha)}}{\zeta(1+\alpha)} [1 - (1-q)^w] = 1 - G(1-q), \end{aligned} \quad (\text{S17})$$

188 where the approximation uses Eq. (S16), the second equality uses the binomial distribution, the third equality

189 uses the definition of conditional probabilities, and the last equality uses the zeta distribution as a model  
 190 for  $P_0(w|w > 0)$ . Moreover,  $G(\xi) = \sum_{w>0} \frac{\xi^{-(1+\alpha)}}{\zeta(1+\alpha)} \xi^w = \zeta(1+\alpha)^{-1} \text{Li}_{1+\alpha}(\xi)$  is the generating function of the  
 191 zeta distribution and  $\text{Li}(\cdot)$  is the polylogarithm. Expectedly,  $q_{\text{eff}}$  is a non-linear and strictly monotonously  
 192 increasing function of  $q$ .

### 193 **S3. Spatial heterogeneity**

#### 194 *S3.1. Correcting for spatially heterogeneous sampling: the role of soccer stadiums*

195 We found that GPS location data at mass events in certain, at least partially roofed locations can be  
 196 flawed. This applies in particular to soccer matches in large stadiums: Some crowdsourcing samples are  
 197 clustered in specific areas within stadiums (Figure S4(a)) which appears implausible. This spurious co-  
 198 location of devices leads to false contacts which need to be identified and removed from the Contact Index  
 199 analyses.

200 The Android operating system uses 3 different technologies to determine device locations: pure GPS  
 201 (samples of type **GPS**) as well as GPS in combination with two Android-specific methods (samples of type  
 202 **NET** or **FUSED**). Using GPS location data labelled with ground truth locations from an on-site experiment at  
 203 the Olympiastadion Berlin, we revealed that samples of type **GPS** are reliable, while certain stadium areas  
 204 appear to be attractors for many samples of type **NET** and **FUSED** (Figure S4(b)). Therefore, we decide to  
 205 remove contacts occurring in these apparent clusters, which is achieved through retaining all contact pairs  
 206 where at least one (of two) co-located samples is of type **GPS**. All stadiums connected to soccer teams in the  
 207 first 3 national soccer leagues receive this special treatment.

208 Only about 10% of in-stadium samples are of type **GPS**. Having thus a 10-fold less dense sampling inside  
 209 of stadiums as compared to outside of stadiums has an impact on the effective sampling parameters  $p$  and in  
 210 particular  $q_{\text{eff}}$  inside of stadiums. This leads us to a situation of heterogeneous sampling within the contact  
 211 network, with some network portions being sampled differently as compared to others. Indexing the two  
 212 geographically distinct regions “outside stadium” and “inside stadium” by 1 and 2, respectively, we identify  
 213 the region-specific sampling parameters as

$$p_1 = \frac{N_1^*}{N_1}, \quad p_2 = \frac{N_2^*}{N_2} \quad (\text{S18})$$

214 and

$$q_1 = \left\langle \frac{N_1^*(t)(N_1^*(t) - 1)}{N_1(N_1 - 1)} \right\rangle_t, \quad q_2 = \left\langle \frac{N_2^*(t)(N_2^*(t) - 1)}{N_2(N_2 - 1)} \right\rangle_t, \quad (\text{S19})$$

215 where  $N_{1/2}^*$  and  $N_{1/2}$  are respectively the number of distinct observed devices and the total population of  
 216 regions 1 and 2. For the sake of convenience, we use  $N_1^* \approx N^*$  and  $N_1 \approx N$ , which reflects that devices  
 217 detected inside stadiums are likely to be also detected outside of stadiums on the same day (equivalently:  
 218 we ignore the number of devices exclusively found inside stadiums). As such,  $p_1$  and  $q_1$  are again equivalent  
 219 to  $p$  and  $q$  under uniform sampling.

220 Computing  $p_2$  requires knowledge of  $N_2$ , i.e. the stadium population present during a match. For  
 221 regularly scheduled matches in the 3 national soccer leagues, among others, this information can be readily  
 222 gathered from [11]. We find that the node sampling inside of relevant stadiums during soccer matches after



removal of samples of type NET or FUSED fluctuates around 73.0% of the level observed outside of stadiums, i.e.  $p_2 = 0.730p_1$ . To simplify the analysis and take into account irregular soccer events such as international matches, we fix  $p_2$  to 73% of  $p_1$  in all stadiums at all times, thus neglecting day- or event-specific variations in the value of  $p_2$ .

To define the overall Contact Index in this non-uniform sampling case, we need to take a different perspective on its definition  $CX = \frac{\langle k^2 \rangle}{\langle k \rangle}$ . Specifically,  $\langle k \rangle$  and  $\langle k^2 \rangle$  count 1-step and 2-step paths along links in the contact network. In the heterogeneously sampled case, we need to count 1-step and 2-step paths within as well as across regions. To this aim, we partition the overall unique contact network into region-specific unique contact networks  $G_1$  and  $G_2$  with adjacency matrices  $\mathbf{A}_1$  and  $\mathbf{A}_2$  such that  $a_{1,ij} = 1$  if  $i$  and  $j$  are in contact in region 1 and similarly for region 2. Note that  $a_{1,ij} = a_{2,ij} = 1$  for any pair that is in contact both inside and outside of stadiums. Within regions, where sampling is again uniform, the estimates of 1-step path counts  $K_{1/2}$  and 2-step path counts  $K_{11/22}$  are estimated following Eqs. (S5) and (S6) as

$$K_{1/2} = \frac{1}{p_{1/2}^2 q_{1/2}} \sum_{ij \in G^*} a_{1/2,ij}^*,$$

$$K_{11/22} = \frac{1}{p_{1/2}^3 q_{1/2}^2} \left( \sum_{ij \neq \ell \in G^*} a_{1/2,ij}^* a_{1/2,i\ell}^* - (1 - p_{1/2} q_{1/2}) \sum_{ij \in G^*} a_{1/2,ij}^* \right). \quad (\text{S20})$$

Moreover, 2-step paths can span across regions with, for instance, the center node  $i$  having contact with  $j$  outside the stadium and with  $\ell$  inside the stadium. Such paths would be retained under network sampling with proba  $p_{1\&2,i} p_{1,j} p_{2,\ell} q_{1,ij} q_{2,i\ell}$ , where  $p_{1\&2}$  is the fraction of nodes found both in region 1 and 2. We approximate  $p_{1\&2} \approx p_2$  to reflect that devices detected inside stadiums are likely to also be detected outside stadiums ( $p_{1|2} = 1$ ) on a given day. The Horvitz-Thompson estimation for the number of such paths ( $K_{12} + K_{21} = 2K_{12}$ ) thus reads

$$K_{12} + K_{21} = \frac{2}{p_1 p_2 p_{1\&2} q_1 q_2} \sum_{ij\ell \in G^*} a_{1,ij}^* a_{2,i\ell}^*. \quad (\text{S21})$$

Overall, the contact number moments then read

$$\langle k \rangle = \frac{K_1 + K_2}{N} = \frac{1}{\frac{N_1^*}{p_1} + \frac{N_2^*}{p_2}} \left( \frac{1}{p_1^2 q_1} \sum_{ij \in G^*} a_{1,ij}^* + \frac{1}{p_2^2 q_2} \sum_{ij \in G^*} a_{2,ij}^* \right) \quad (\text{S22})$$

and

$$\begin{aligned} \langle k^2 \rangle &= \frac{K_{11} + K_{22} + K_{12} + K_{21}}{N} \\ &= \frac{1}{\frac{N_1^*}{p_1} + \frac{N_2^*}{p_2}} \left[ \frac{1}{p_1^3 q_1^2} \left( \sum_{ij \neq \ell \in G^*} a_{1,ij}^* a_{1,i\ell}^* - (1 - p_1 q_1) \sum_{ij \in G^*} a_{1,ij}^* \right) \right. \\ &\quad \left. + \frac{1}{p_2^3 q_2^2} \left( \sum_{ij \neq \ell \in G^*} a_{2,ij}^* a_{2,i\ell}^* - (1 - p_2 q_2) \sum_{ij \in G^*} a_{2,ij}^* \right) \right] \quad (\text{S23}) \end{aligned}$$

$$+ \frac{2}{p_1 p_2 p_{1&2} q_1 q_2} \sum_{ij\ell \in G^*} a_{1,ij}^* a_{2,i\ell}^* \Big]. \quad (\text{S24})$$

244 Note that contacts occurring in both regions (such as friends watching a match together and then going  
 245 to a restaurant together) are counted twice, once in each region. In the case of non-unique contacts where  
 246 repeated contacts should not be counted, we should therefore introduce a cross-region correction term  
 247  $\left(-\sum_{ij} a_{1,ij} a_{2,ij}\right)$  for  $\langle k \rangle$  and  $\left(-\sum_{ij\ell} a_{1,ij} (a_{1,i\ell} a_{2,i\ell}) - \sum_{ij\ell} (a_{1,ij} a_{2,ij}) a_{2,i\ell}\right)$  for  $\langle k^2 \rangle$  to remove multiple  
 248 counts of contacts present in both regions. For simplicity, we here neglect these corrections, as such contacts  
 249 are rare. Figure S4(c) compares the overall Contact Index  $CX$  and contributions from stadiums  $\frac{K_{22}}{K_1+K_2}$ ;  
 250 Expectedly, stadium contributions are indistinguishable from zero during Christmas holidays and lockdown  
 251 periods. Stadium contributions are small (by a factor of at least  $\sim 10$ ) at all times compared to overall  
 252 contact levels [12].

### 253 *S3.2. Spatially heterogeneous contact patterns*

254 To demonstrate the dimensionality and comparability of the Contact Index  $CX$ , we compute  $CX$  sepa-  
 255 rately for all 16 German federal states: We partition the daily Germany-wide contact network by coloring  
 256 the nodes according to their home states. The home state of a device is inferred on a monthly basis as the  
 257 largest spatial cluster of samples among all of its samples over the course of the month. For any federal  
 258 state,  $CX = \frac{\langle k^2 \rangle}{\langle k \rangle}$  is then computed from the distribution of unique contact numbers  $k_i$  among all observed  
 259 devices  $i$  based in that state, including cross-state contacts. State-level sampling parameters  $p$  and  $q_{\text{eff}}$  are  
 260 computed in complete analogy to the national level.

261 The classification of nodes by home location is relevant for epidemic statistics, as infection test results  
 262 are typically recorded and associated with an individual's home location. In 2020, high daily  $CX$  values at  
 263 the state level are indicative of high state-specific 7-day average SARS-CoV-2 reproduction numbers  $R_{\text{eff}}$ ,  
 264 computed from state-level infection numbers, about  $\Delta t = 16$  days later (Figure S4(e)). Yet, increasing the  
 265 spatial resolution for  $CX$  or, equivalently, computing  $CX$  for smaller portions of the network is limited by  
 266 the sampling depth of our crowdsourcing approach: The signal-to-noise ratio is decreased as fewer absolute  
 267 numbers of individuals are available to estimate the moments  $\langle k \rangle$  and in particular  $\langle k^2 \rangle$ . Upon estimating  
 268 confidence intervals for  $CX$ , we found that nation- and state-level  $CX$  are significant, but most county-level  
 269  $CX$  values are not.

270 Comparing long-term averaged  $CX$  values between federal states reflects the expectation that levels of  
 271 contacts tend to be globally higher in city states with high population density (Berlin, Hamburg, Bremen)  
 272 than in geographically wide-stretching states and also higher in East German states compared to West  
 273 German states (Figure S4(d)).

## 274 **S4. Determining and analyzing relative transmissibility $\langle T \rangle$ using $CX$**

### 275 *S4.1. Calibration of $R$ and $CX$ using 2020-specific data*

276 Throughout the manuscript, we use centered 7-day averages  $\langle CX \rangle(t) = \frac{1}{7} \sum_{\tau=-3}^3 CX(t+\tau)$  to eliminate  
 277 weekly periodicity in  $CX$  and maintain only its long-term trend, but skip the brackets  $\langle \cdot \rangle$  for clarity. We  
 278 use daily Contact Index values  $CX$  and SARS-CoV-2 reproduction numbers  $R_{\text{eff}}$  (now-cast data recorded

279 by RKI [13]) in the time window between 04/01/2020 and 12/31/2020 to establish the relationship between  
 280 contact and transmission levels in absence of other factors: SARS-CoV-2 testing has become widely accessible  
 281 by April 2020, while the turn of the year 2020/2021 marks the beginning of vaccine campaigns and the  
 282 takeover of immune escape variants other than wild-type SARS-CoV-2. This time range covers parts of  
 283 the first and second lockdowns in Germany as well as the comparatively unregulated summer 2020, thus  
 284 providing ample amount of dynamics in terms of contact behaviour (Figure S1(a)) to study the correlation  
 285 between the  $CX$  and  $R_{\text{eff}}$  time series.

286 For  $\Delta t = 16$  days, time lead for which the linear Pearson correlation  $\text{Corr}[CX, R_{\text{eff}}](\Delta t)$  between  $CX$   
 287 and  $R_{\text{eff}}$  is maximal (Figure S1(a, right inset)), we perform a linear regression of the data [6],

$$R_{\text{WT}}(t + \Delta t) = R_{\text{WT}}(CX(t)) = a + b \cdot CX(t), \quad (\text{S25})$$

288 with parameters  $a$  and  $b$  found by minimizing the unweighted sum of squared residuals to be  $a = 0.56$  and  
 289  $b = 0.01$  (Figure S1(a, left inset)). The time lead of  $\Delta t = 16$  days between the contact and the day appointed  
 290 by the RKI for now-cast  $R_{\text{eff}}$  values is explained, among other things, by the incubation period, delay in  
 291 reporting, and averaging intervals.

#### 292 *S4.2. Relative transmissibility: overall dynamics less the contacts*

293 Given the value of  $CX$  on day  $t$ , Eq. (S25) provides a prediction of  $R_{\text{WT}}$  on day  $t + \Delta t$ . Then, we can  
 294 interpret the discrepancy (ratio) between the prediction  $R_{\text{WT}}$  and official  $R_{\text{eff}}$  value

$$T(t) = \frac{R_{\text{eff}}(t + \Delta t)}{R_{\text{WT}}(CX(t))}. \quad (\text{S26})$$

295 as the discrepancy between wild-type transmission efficiency under unperturbed conditions and actual trans-  
 296 mission efficiency, i.e. the *relative transmissibility* of the contagion. This leads to a noisy time series  $T(t)$   
 297 for the slowly varying relative transmissibility whose trend is, by the easiest of all methods, captured by  
 298 a smoothed signal  $\langle T \rangle(t) = \frac{1}{2\tau+1} \sum_{\Delta t=-\tau}^{\tau} T(t)$  where we here used  $\tau = 30$  days, i.e. sliding centered  
 299 averages over 2 months.

#### 300 *S4.3. Confounding: correlation of $\langle T \rangle$ with other time series*

301 To interpret the quantity  $\langle T \rangle(t)$ , we study the correlation between its daily trends ( $\langle T \rangle(t) - \langle T \rangle(t-1)$ )  
 302 with those of various other time series since the end of the time window used for calibration of  $CX$  and  
 303  $R$  (2021/01/01). Results are shown in Figure S1(b,c). We here include epidemic factors (virus mutant fre-  
 304 quencies [14], population share per vaccination status [15]), test positivity [16], averages of locally measured  
 305 prevalence [17]), and network sampling ( $p$  and  $q$ ), as well as other topological features of the measured  
 306 contact networks (cluster coefficient, smallworldness, etc.). Similarly to  $\langle T \rangle(t)$ , we first compute a tempo-  
 307 ral average  $\langle \mathcal{O} \rangle(t) = \frac{1}{2\tau+1} \sum_{\Delta t=-\tau}^{\tau} \mathcal{O}(t)$  with  $\tau = 30$  days for any quantity  $\mathcal{O}$  before computing Pearson  
 308 correlations between  $\langle T \rangle(t)$  and  $\langle \mathcal{O} \rangle(t)$ .

309 To correlate  $\langle T \rangle(t)$  with SARS-CoV-2 evolutionary dynamics, we define a time series given by

$$\mathcal{O}(t) = \sum_{\mu} |f_{\mu}(t) - f_{\mu}(t-1)| \quad (\text{S27})$$

310 where  $f_\mu(t)$  denotes the centered 7-day average frequency of SARS-CoV-2 mutant  $\mu$  on day  $t$ . This time  
 311 series peaks whenever absolute frequency slopes are high, i.e. whenever a takeover by a new variant occurs.

312 SARS-CoV-2 prevalence studies are restricted in space and time: Typically, blood samples are taken and  
 313 analyzed at the city or county level over the range of a few weeks. For every day  $t$ , we here use the average  
 314 prevalence value across prevalence studies at different locations covering that day  $t$ , if any, as an indicator  
 315 for the Germany-wide SARS-CoV-2 prevalence  $\mathcal{O}(t)$ .

316 Unlike for the Contact Index  $CX$  which is tractable through Horvitz-Thompson theory, the scaling of  
 317 topological features upon network sampling is more intricate or even impossible. Network sampling was  
 318 shown to affect different topology metrics in various ways [18, 19]. Here, we simply use topological features  
 319 of the measured sample networks. However, since the sampling scheme remains itself overall unchanged, we  
 320 expect potential biases to be constant in time and trends in sample networks to reflect actual trends within  
 321 the underlying complete networks. For every day  $t$ , we aggregate the measured networks between  $t$  and  $t+6$   
 322 to increase the statistical basis for the computation of topology measures, i.e. we include a link between a  
 323 given pair of devices if there is a link on at least one day of the 7 days between  $t$  and  $t+6$ .

## 324 S5. Epidemic forecast

### 325 S5.1. SARS-CoV-2

326 The challenge of epidemic forecast consists in the accurate prediction of current and future infection  
 327 numbers or reproduction numbers. Now-cast  $R_{\text{eff}}$  values, as published by the RKI for SARS-CoV-2 [13],  
 328 do not provide a real-time picture of the infection dynamics, as they reflect past infections arising from  
 329 past contacts with a delay of around  $\Delta t = 16$  days. As a result, denoting the current day by  $t_0$ , infection  
 330 surveillance can provide insights only up to day  $t_0 - \Delta t$ , i.e. up to 2 – 3 weeks ago.

331 On the contrary, our crowdsourcing and  $CX$  data is being collected and processed in near real-time.  
 332 Currently, the data import process from mobile devices induces a delay of only 2 days, but which is being  
 333 further reduced via optimization of the data pipeline. The real-time nature of  $CX$  thus leads to a straight-  
 334 forward forecast of recent and current reproduction numbers up to  $t_0$ , under the assumption of unchanged  
 335 relative transmissibility trend. The relative transmissibility  $\langle T \rangle$  itself inherits its delay of  $\Delta t = 16$  days from  
 336  $R_{\text{eff}}$  and is projected beyond  $t_0 - \Delta t$  (see below). Beyond  $t_0$ , both  $CX$  and relative transmissibility  $T$  need  
 337 to be projected from previous data.

338 For given  $t_0$ , we fit auto-regressive integrated moving-average (ARIMA) models to the time series: For  
 339  $CX$ , we use the last 60 data points up to  $t_0$  to fit a model with auto-regressive order  $p = 2$ , differencing  
 340 degree  $d = 1$  and moving-average order  $q = 2$ . For  $\langle T \rangle$ , we use the last 180 data points up to  $t_0 - \Delta t$  and  
 341  $p = 2$ ,  $d = 1$  and  $q = 3$ . We use the fitted models to project the time series up to 30 days into the future,  
 342 i.e. up to  $t_0 + 30$ . The reproduction number forecast is then obtained from the  $CX$  and  $T$  time series via  
 343 Eq. (2) and the  $1\sigma$  (68%) confidence intervals from the ARIMA models  $\Delta CX$  and  $\Delta T$  are propagated to  
 344  $R_{\text{pred}}$  through

$$\Delta R_{\text{pred}} = (a + b \cdot CX)\Delta T + b \cdot \Delta CX \cdot T. \quad (\text{S28})$$

345 As a null forecast that makes no use of our contact measurement, we project the infection surveillance  
 346 data beyond  $t_0 - \Delta t$  by fitting a model with  $p = 0$ ,  $d = 2$  and  $q = 0$  to the last 60 days of  $R_{\text{eff}}$  data.

347 To showcase and evaluate our epidemic forecast, we iterate  $t_0$  between 10/01/2020 and 12/20/2022 and  
348 (i) compare  $R_{\text{pred}}$  and its confidence interval with the actual  $R_{\text{true}}$  for selected  $t_0$  (Figure 2(a, upper panel))  
349 and (ii) compare the distribution of residuals ( $R_{\text{pred}} - R_{\text{true}}$ ) over all choices of  $t_0$  at all time points between  
350  $t_0 - \Delta t$  and  $t_0 + 30$  between the null and actual forecasts (Figure 2(a, lower panel)).

## 351 *S5.2. Influenza*

352 To demonstrate the broad applicability of our method to airborne transmissible diseases, we perform  
353 a forecast of Influenza infection levels equivalently to our SARS-CoV-2 forecast (Figure S2). The case of  
354 Influenza comes with two major limitations unrelated to our method: 1) Infection surveillance is not as  
355 systematic as for SARS-CoV-2. For Germany, the RKI publishes weekly infection numbers [20], from which  
356 we define a rough estimation of  $R(t)$  as the ratio of the current ( $t$ ) and one-week prior ( $t - 7$ ) smoothed  
357 infection numbers. Of note, the goal of this approach is solely to define a time series that represents the  
358 trends in infection levels, not to rigorously define reproduction numbers. 2) Unlike epidemic SARS-CoV-2,  
359 endemic Influenza has no phase with constant mutant background required for the calibration of  $R$  and  $CX$ .  
360 For simplicity, we therefore assume a similar relationship as for SARS-CoV-2 and use identical regression  
361 parameters  $a$  and  $b$ . This assumption, however, should only affect the scale of the quantities, not their  
362 trends and forecast performances.

## 363 **References**

- 364 [1] E. D. Kolaczyk, G. Csárdi, Statistical analysis of network data with R, Vol. 65, Springer, 2014.  
365 [2] P. Hu, W. C. Lau, A survey and taxonomy of graph sampling, arXiv preprint arXiv:1308.5865 (2013).  
366 [3] R. Pung, J. A. Firth, L. G. Spurgin, V. J. Lee, A. J. Kucharski, Using high-resolution contact networks to evaluate  
367 sars-cov-2 transmission and control in large-scale multi-day events, Nature communications 13 (1) (2022) 1–11.  
368 [4] P. Sapiezynski, A. Stopczynski, D. D. Lassen, S. Lehmann, Interaction data from the copenhagen networks study, Scientific  
369 Data 6 (1) (2019) 1–10.  
370 [5] S. M. Kissler, P. Klepac, M. Tang, A. J. Conlan, J. R. Gog, Sparking “the bbc four pandemic”: Leveraging citizen science  
371 and mobile phones to model the spread of disease, BioRxiv (2020) 479154.  
372 [6] S. Rüdiger, S. Konigorski, A. Rakowski, J. A. Edelman, D. Zernick, A. Thieme, C. Lippert, Predicting the sars-cov-2  
373 effective reproduction number using bulk contact data from mobile phones, Proceedings of the National Academy of  
374 Sciences 118 (31) (2021).  
375 [7] M. Á. Serrano, M. Boguñá, R. Pastor-Satorras, Correlations in weighted networks, Physical Review E 74 (5) (2006) 055101.  
376 [8] J.-D. J. Han, D. Dupuy, N. Bertin, M. E. Cusick, M. Vidal, Effect of sampling on topology predictions of protein-protein  
377 interaction networks, Nature biotechnology 23 (7) (2005) 839–844.  
378 [9] A. Clauset, C. R. Shalizi, M. E. Newman, Power-law distributions in empirical data, SIAM review 51 (4) (2009) 661–703.  
379 [10] R. Perline, Strong, weak and false inverse power laws, Statistical Science (2005) 68–88.  
380 [11] kicker. [link].  
381 URL <https://www.kicker.de/>  
382 [12] B. García Bulle, D. Shen, D. Shah, A. E. Hosoi, Public health implications of opening national football league stadiums  
383 during the covid-19 pandemic, Proceedings of the National Academy of Sciences 119 (14) (2022) e2114226119.  
384 [13] M. an der Heiden, Sars-cov-2-nowcasting und -r-schaetzung (Jan. 2023). doi:10.5281/zenodo.7571376.  
385 URL <https://doi.org/10.5281/zenodo.7571376>  
386 [14] R. Koch-Institut. [link].  
387 URL [https://www.rki.de/DE/Content/InfAZ/N/Neuartiges\\_Coronavirus/Daten/V0C\\_V0I\\_Tabelle.xlsx?\\_\\_blob=publicationFile](https://www.rki.de/DE/Content/InfAZ/N/Neuartiges_Coronavirus/Daten/V0C_V0I_Tabelle.xlsx?__blob=publicationFile)  
388 publicationFile  
389 [15] R. Koch-Institut. [link].  
390 URL [https://www.rki.de/DE/Content/InfAZ/N/Neuartiges\\_Coronavirus/Daten/Impfquotenmonitoring.xlsx?\\_\\_blob=publicationFile](https://www.rki.de/DE/Content/InfAZ/N/Neuartiges_Coronavirus/Daten/Impfquotenmonitoring.xlsx?__blob=publicationFile)  
391 blob=publicationFile

- 392 [16] E. Mathieu, H. Ritchie, L. Rodés-Guirao, C. Appel, C. Giattino, J. Hasell, B. Macdonald, S. Dattani, D. Beltekian,  
393 E. Ortiz-Ospina, M. Roser, Coronavirus pandemic (covid-19), Our World in Data <https://ourworldindata.org/coronavirus>  
394 (2020).
- 395 [17] H. Neuhauser, N. Buttman-Schweiger, J. Fiebig, C. Poethko-Müller, F. Prütz, G. Sarganas Margolis, R. Thamm, M. Zimmermann,  
396 Observatorium serologischer Studien zu SARS-CoV-2 in Deutschland (Sep. 2022). doi:10.5281/zenodo.7043025.  
397 URL <https://doi.org/10.5281/zenodo.7043025>
- 398 [18] J. D. Noh, Percolation transition in networks with degree-degree correlation, *Physical Review E* 76 (2) (2007) 026116.
- 399 [19] S. H. Lee, P.-J. Kim, H. Jeong, Statistical properties of sampled networks, *Physical review E* 73 (1) (2006) 016102.
- 400 [20] R. Koch-Institut, [Survstat@rki 2.0](mailto:Survstat@rki.de).  
401 URL <https://survstat.rki.de/>
- 402 [21] T. Hale, N. Angrist, R. Goldszmidt, B. Kira, A. Petherick, T. Phillips, S. Webster, E. Cameron-Blake, L. Hallas, S. Majumdar, et al., A global panel database of pandemic policies (oxford covid-19 government response tracker), *Nature human*  
403 *behaviour* 5 (4) (2021) 529–538.  
404

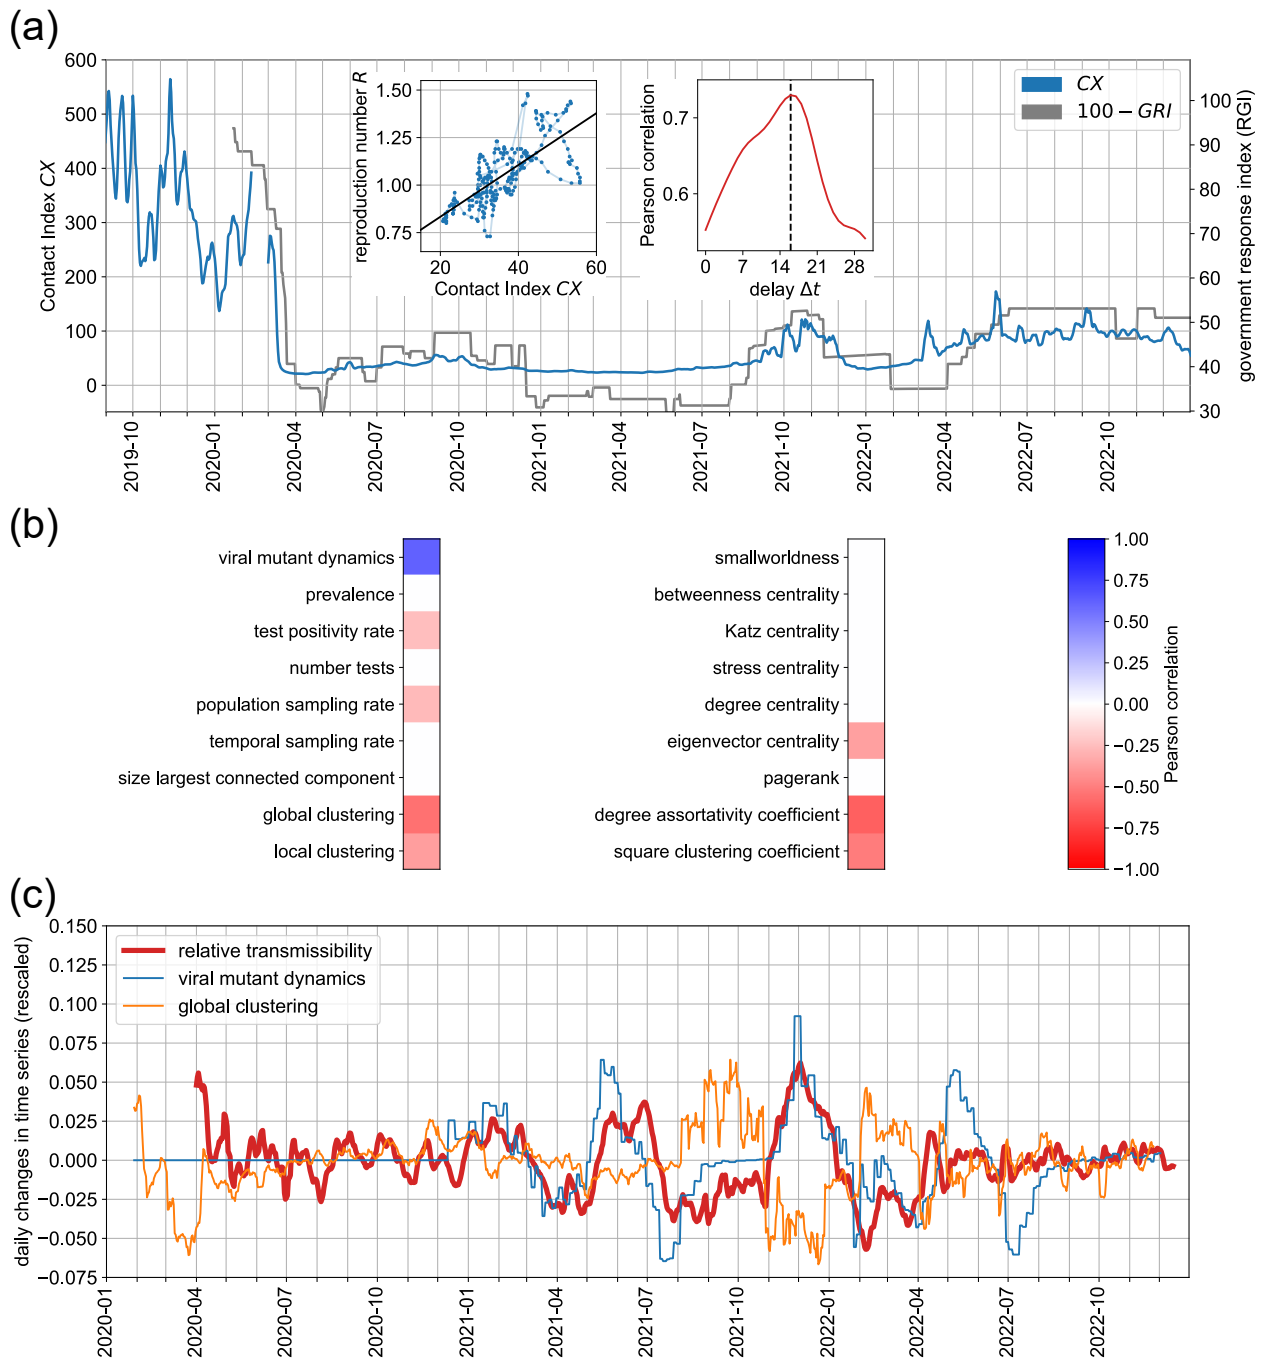

Figure S1: (Continued on the following page.)

Figure S1: **(a)** Comparison of the Contact Index  $CX$  (same as in Figure 1(a)) with the Government Response Index [21], indicating concurrent trends albeit no causal link between non-pharmaceutical health policies (NPIs) and contact levels. **(a, left inset)** Calibration of the Contact Index  $CX(t)$  and SARS-CoV-2 effective reproduction numbers  $R_{\text{eff}}(t + \Delta t)$  ( $\Delta t = 16$  days), independently recorded by the RKI [13], between April and December 2020 by linear regression. A linear relationship between  $CX$  and  $R_{\text{eff}}$ , with a certain temporal shift  $\Delta t$  due to incubation time and testing/reporting delays, is expected in predominantly contact-driven epidemic trends (absence of immune escape variants and vaccination). **(a, right inset)** Pearson correlation between  $CX(t)$  and  $R_{\text{eff}}(t + \Delta t)$  between April and December 2020 as a function of the time lead  $\Delta t$ . The correlation is highest for a time lead of  $\Delta t = 16$  days, thus implying that  $CX$  precedes reproduction numbers by about 2 – 3 weeks. **(b)** Interpretation of relative transmissibility  $\langle T \rangle(t)$ : Correlation between SARS-CoV-2 relative transmissibility changes  $\langle T \rangle(t) - \langle T \rangle(t - 1)$  and various time series (frequency trends of variants, average of local prevalence levels, test positivity, network sampling parameters, and topological features of the contact network as estimated from network samples disregarding potential effects from network sampling). **(c)** Comparison of normalized time series between transmission trends and the most strongly correlated features identified in (b).



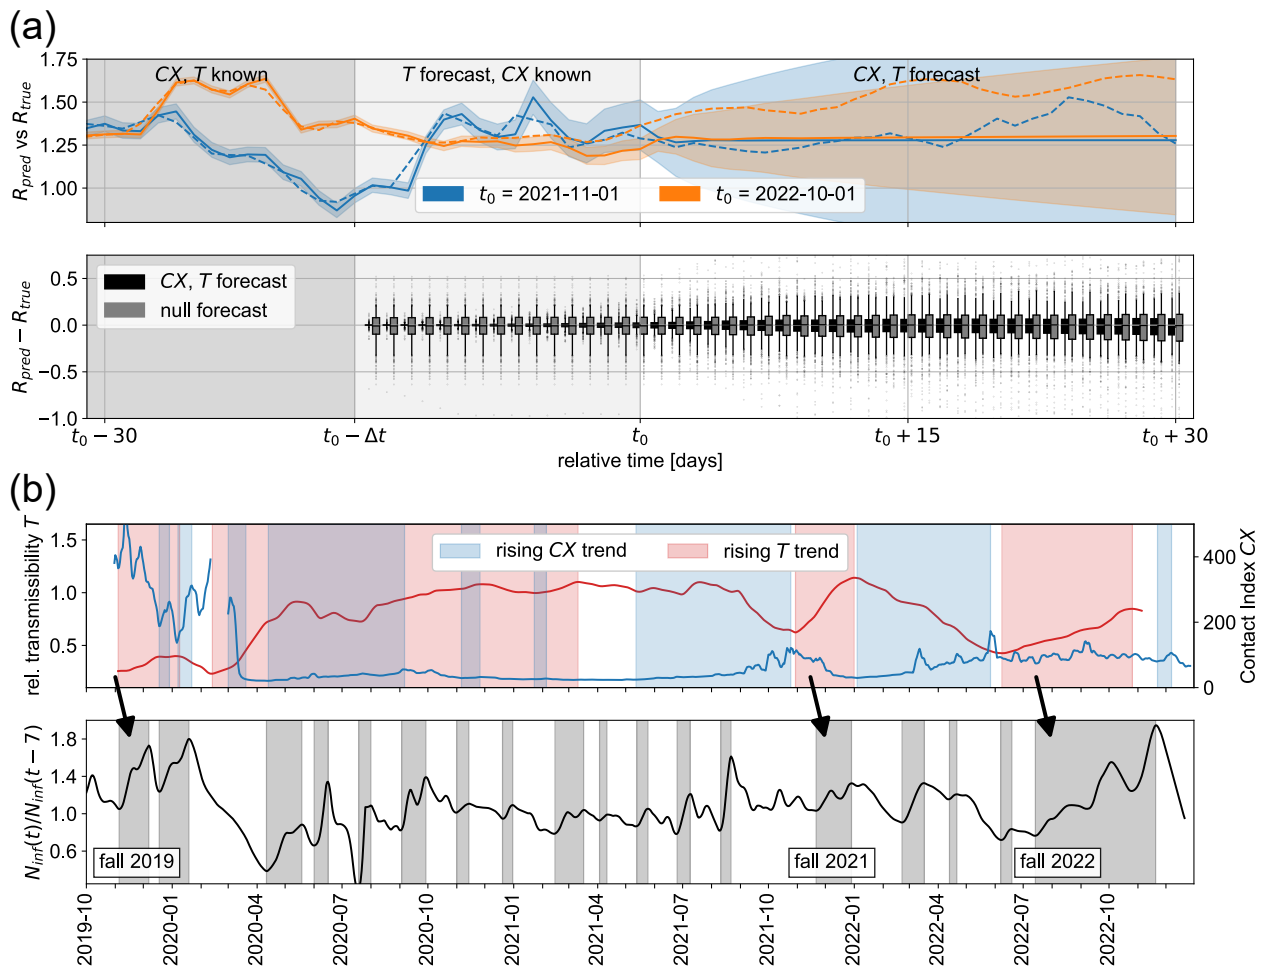

Figure S2: Same as Figure 2, but for Influenza.

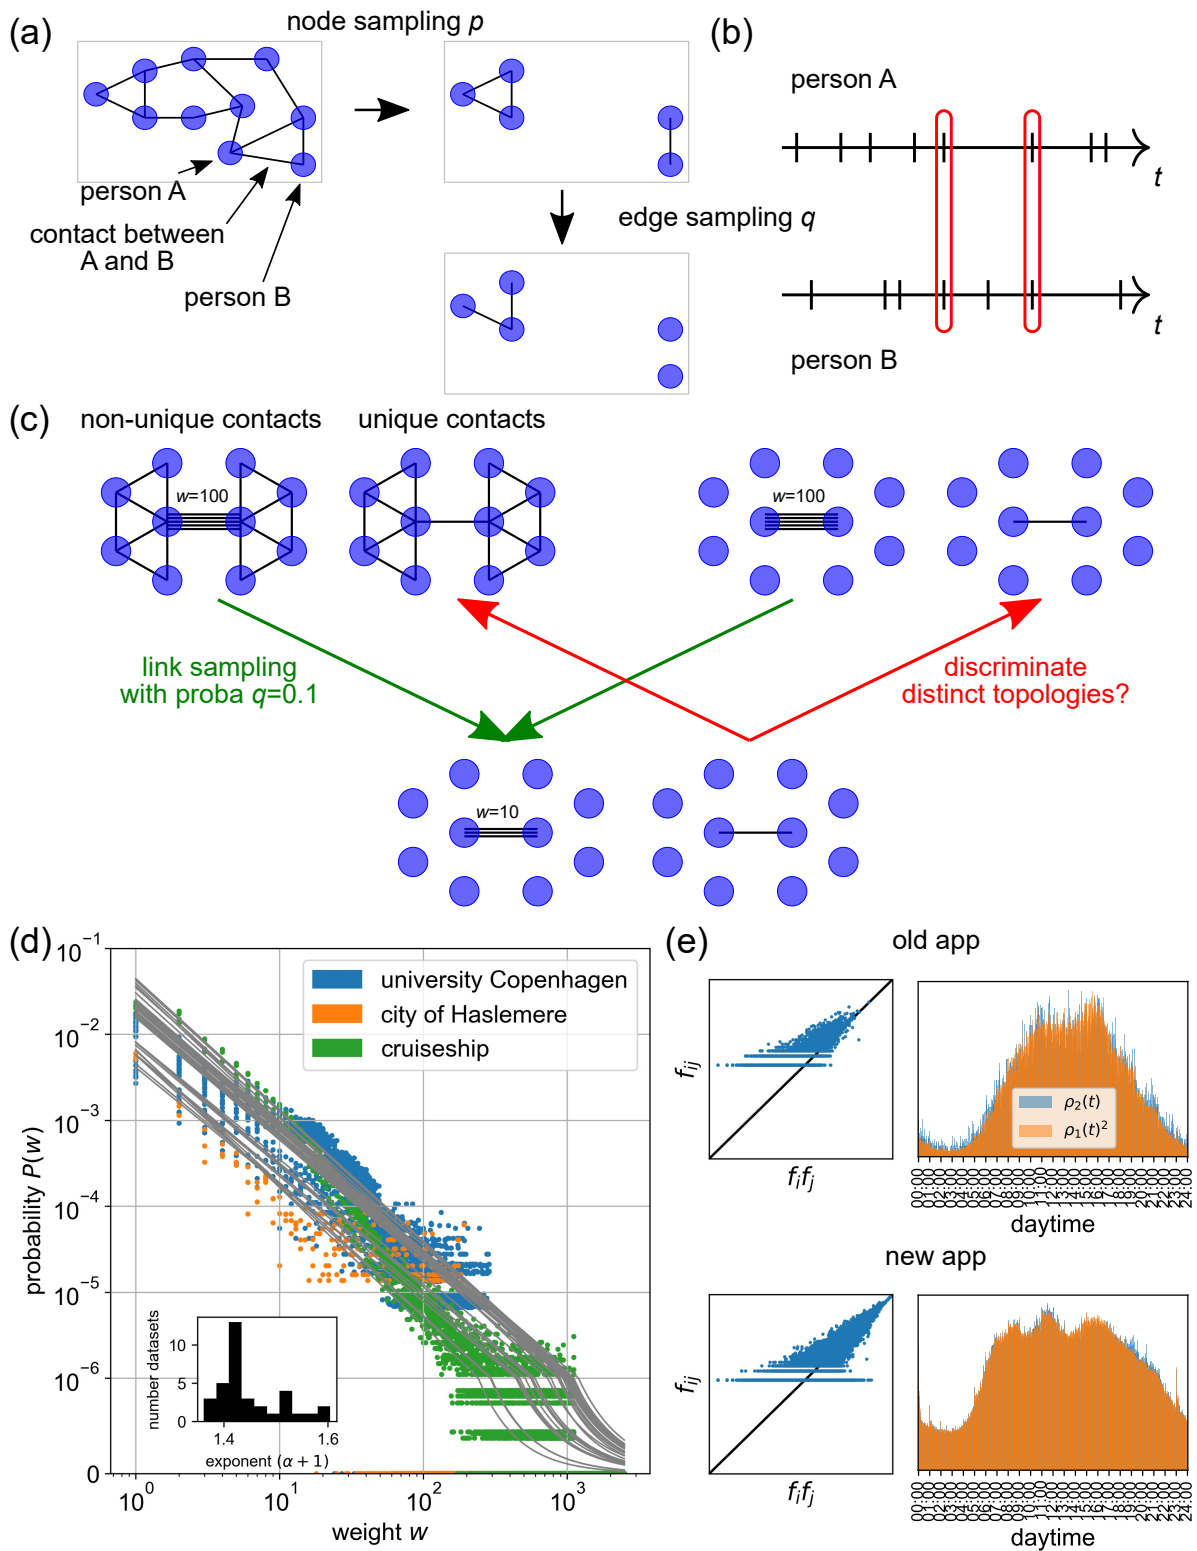

Figure S3: (Continued on the following page.)

Figure S3: **Sampling and topological information in contact networks.** (a) Definition of contact networks and network sampling: Individuals/mobile devices are represented by nodes and contacts from physical proximity between pairs of individuals by edges or links between corresponding nodes. The network sampling process induced by the crowdsourcing app retains nodes (including links between pairs of retained nodes) with proba  $p$ , reflective of the share of app users within the population. Subsequently, links are retained with proba  $q$ , reflective of the likelihood of simultaneous samples between a pair of active devices. (b) Ticks along the time axes indicate the samples from 2 different devices. A necessary condition to observe a contact between two devices are simultaneous samples from those devices (red encircled samples). The probability  $q$  of such an event depends on the rate of such samples. (c) In non-unique contact networks, links are weighted by the duration or multiplicity of contact  $w_{ij} \in \{0, 1, 2, \dots\}$  between nodes  $i$  and  $j$  over the course of a day, while unique contact networks only distinguish between presence or absence of contact,  $a_{ij} \in \{0, 1\}$ . Example of information loss upon link sampling: Networks with distinct topologies (left vs. right set of networks) can yield similar sample networks (bottom network) upon the same sampling process (green arrows). Discriminating distinct original networks from the sample network (red arrows) thus requires additional information. (d) Weight distributions  $P(w)$  found in complete daily contact networks from the literature [3, 4, 5]. Here, “complete” refers to the aspect that these networks represent a fraction of the population ( $p < 1$ ), but all contacts within that subpopulation are being detected ( $q = 1$ ) – node sampling, but no edge sampling. (e) Sample rates and their implications for link sampling probability  $q$ . Comparison between actual two-device simultaneous sample rates  $f_{ij}$  and those predicted from uncorrelated single-device sample rates  $f_i f_j$  (left panel). The observed effective correlation of samples across devices ( $f_{ij} > f_i f_j$ ), especially for the old app, stems from the non-uniformity of the sample/device activity distribution  $\rho_1(t)$  across the day (right panel); devices are more active during daytime than at night, an effect particularly prominent in the old app. However, aside from a common daytime pattern, devices show a predominantly independent activity pattern from one another: At any given timepoint (2 min interval), squared single-device distributions, i.e.  $\frac{\rho_1(t)^2}{\int \rho_1(t)^2 dt}$ , do capture the distribution of simultaneous samples  $\rho_2(t)$  across the day well. A major app update in early 2020 has significantly altered the daytime distribution and overall number of samples (top versus bottom set of panels).

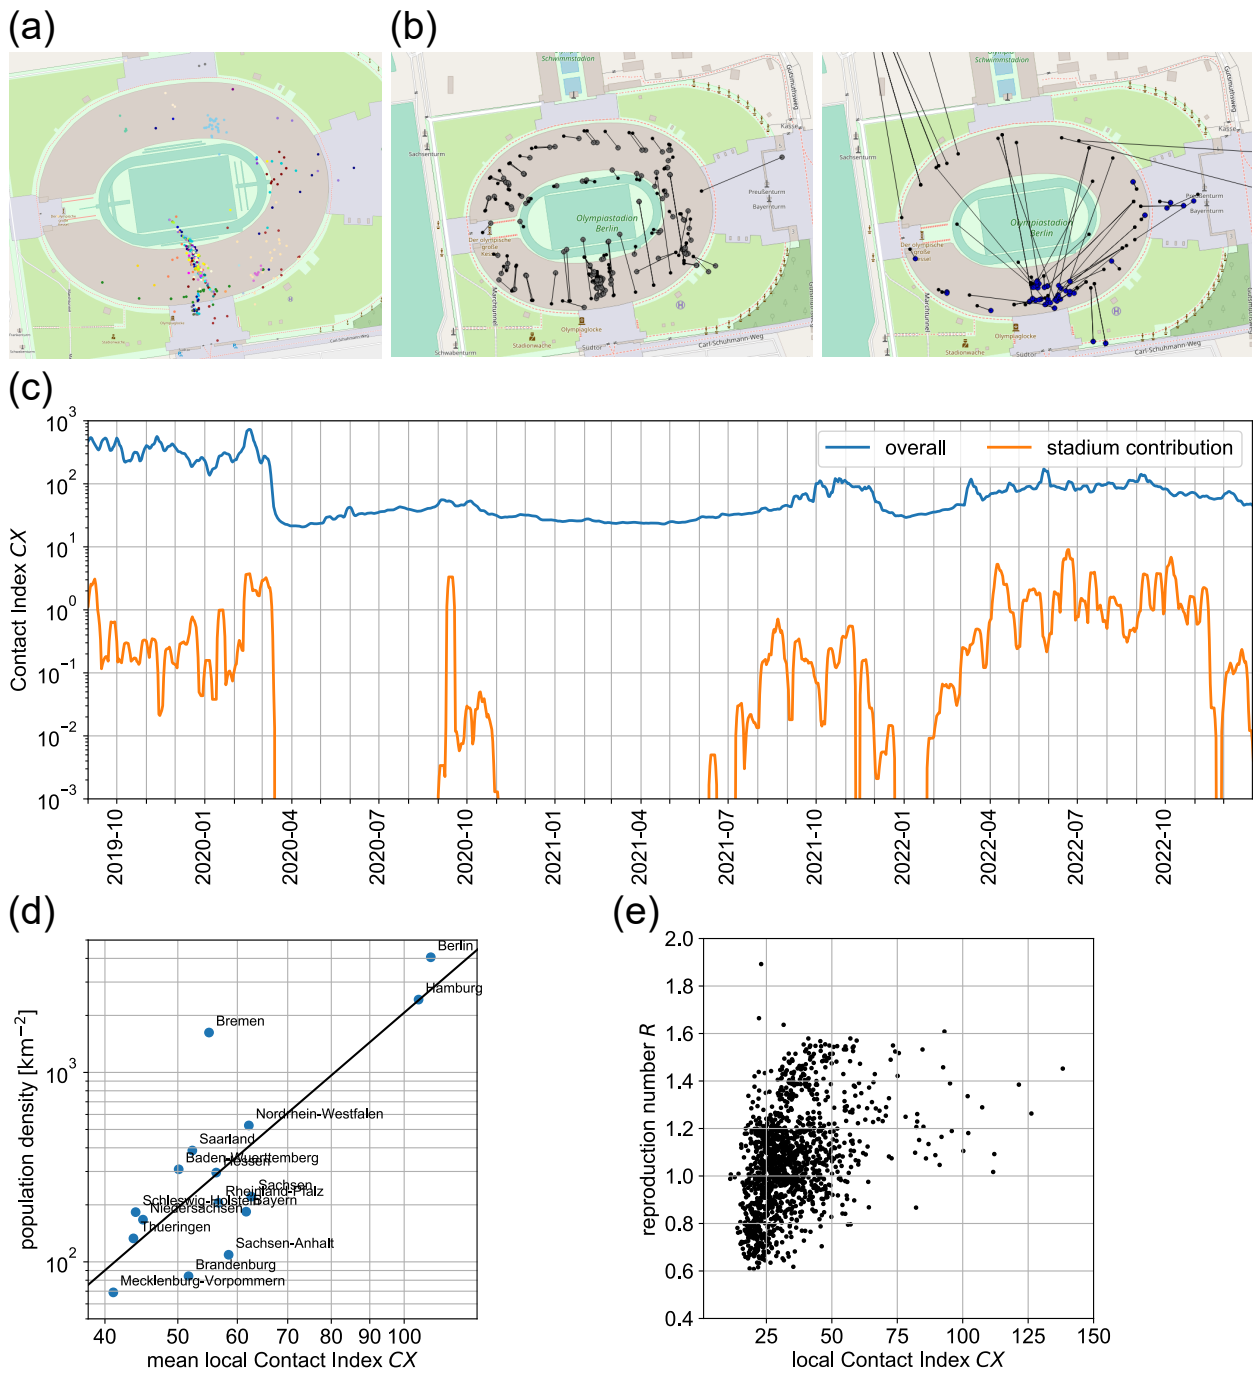

Figure S4: (Continued on the following page.)

Figure S4: **Spatial heterogeneity of sampling and contact levels.** (a) Distribution of samples in the Olympiastadion Berlin area during the Berlin-Wolfsburg soccer match on 08/14/2021, showing an implausible concentration of samples in the southern part. (b) Comparison between positions determined by the app and actual, ground truth positions from an experiment conducted in the Olympiastadion Berlin. GPS-sourced locations (left) reflect true positions, while NET-sourced locations oftentimes are systematically off (right), with particular locations acting as attractors. (GPS and NET refer to distinct localization methods defined by the Android operating system.) (c) Comparison between overall  $CX$  (same as Figure 1(a)) and its contributions from major soccer stadiums. Stadium attendance appears to have negligible impact on overall contact levels; note the log scale on vertical axis. Periods with stadium contribution below  $10^{-3}$  are those where mass events were banned by health policy measures. (d) Relationship between average  $CX$  values specific to federal states of Germany and their population densities. City states (Berlin, Hamburg) with the exception of Bremen expectedly tend towards higher  $CX$  values. Eastern states tend towards higher  $CX$  than Western states with similar population density. (e) Relationship between state-specific  $CX$  and state-specific  $R_{\text{eff}}$  values in 2020.
